# Supplementary material for: Inflammation-induced lysosomal dysfunction in human iPSC-derived microglia is exacerbated by APOE 4/4 genotype
Source: Research Square preprint supplement (doi:10.21203/rs.3.rs-6241569/v1), 2025-03-28
Supplement: Supplementary file 2 [file 5b857fba88e88a53231801bf.xlsx]

## Sheet: Summary
Summary of supplementary tables.
Table S1	Differential metabolic features between APOE 4/4 and E3/3 iMGS in the basal (NT) conditions and after 48h of LPS + IFNγ stimulation (TI).
Table S2	Differentially expressed proteins in APOE 3/3 iMGs after 48h of LPS + IFNγ stimulation as compared to the basal conditions.
Table S3	Ingenuity pathway analysis (IPA) of LPS + IFNγ-stimulated APOE 3/3 iMGs.
Table S4	Differentially expressed proteins in APOE 4/4 iMGs as compared to E3/3 in basal conditions.
Table S5	Differentially expressed proteins in APOE 4/4 iMGs as compared to E3/3 after 48h of LPS+IFNγ stimulation.

## Sheet: Table S1
							Differential features between genotypes in NT			Differential features between genotypes in TI
Ion mode	RT [min]	m/z	Metabolite ID	Compound class	ID level	HMDB ID	Estimate	p-value	q-value	Estimate	p-value	q-value
HILIC+	1.111	136.062	Adenine	Nucleobase	2	HMDB0000034	2.96948e+06	0.517616	0.993732	5.99427e+06	3.24308e-11	2.52904e-07
HILIC+	5.673	172.108	Pro-Ala-Arg	Tripeptide	2	-	7.71909e+06	0.150453	0.993732	1.77261e+07	2.87581e-09	1.10135e-05
RP+	6.865	625.211	Unknown C29H36O15		4		-215143	0.555525	0.993732	776010	6.48681e-09	2.17373e-05
HILIC−	0.876	192.067	Unknown C10H11NO3		4		139513	0.0563045	0.993732	322237	9.84116e-09	2.93135e-05
RP+	8.233	530.255	Unknown C32H35NO6		4		220545	0.528328	0.993732	379204	3.45686e-08	7.72262e-05
HILIC+	0.4	252.18	Unknown C12H21N5O		4		559402	0.0761834	0.993732	494594	4.6483e-08	9.5855e-05
RP+	6.427	299.111	Unknown C14H18O7		4		851446	0.259352	0.993732	625504	1.94472e-07	0.000289634
RP+	7.233	261.109	Unknown C10H16N2O6		4		3.84095e+06	0.194686	0.993732	1.34714e+06	2.39372e-07	0.000305575
HILIC+	5.673	268.141	Unknown C11H17N5O3		4		2.35199e+06	0.197726	0.993732	5.65405e+06	2.96657e-07	0.000345773
HILIC−	0.86	168.067	Unknown C7H9NO		4		276224	0.232667	0.993732	648308	4.11528e-07	0.000443701
HILIC+	5.673	173.092	Unknown C7H12N2O3		4		59075.7	0.927926	0.998077	1.04756e+06	4.79575e-07	0.000494479
RP−	1.845	144.046	Unknown C9H7NO		4		-833.997	0.733735	0.993732	209041	2.18429e-06	0.00150145
RP+	1.861	174.055	L-Kynurenine	Amino acid	2	HMDB0000684	-18341.2	0.069942	0.993732	897473	6.41277e-06	0.0034282
HILIC+	0.849	170.081	Pyridoxine (Vitamin B6)	Vitamin B	1	HMDB0000239	1.66006e+07	0.225439	0.993732	34026552	1.21975e-05	0.00583913
HILIC+	0.746	128.144	Coniine	Alkaloid	2	HMDB0030285	1.76235e+06	0.025085	0.993732	2.00351e+06	5.39677e-05	0.0190364
HILIC+	4.019	188.071	L-Tryptophan	Amino acid	1	HMDB0000929	2.75086e+06	0.0772106	0.993732	196450	0.000137266	0.0391472
RP+	3.893	194.081	Phenylacetylglycine	Amino acid	2	HMDB0000821	294779	0.416519	0.993732	1.09171e+06	0.000226699	0.0590034
RP+	0.812	150.059	L-Methionine	Amino acid	2	HMDB0000696	2.5536e+07	0.377855	0.993732	73888164	0.000411969	0.0905251
RP+	10.52	457.313	Terpenoid C25H44O7	Terpenoid	3	-	-824372	0.362463	0.993732	2.06061e+06	0.000429993	0.0910711
RP+	9.797	372.348	Unknown C22H45NO3		4		1.40325e+06	0.426589	0.993732	2.00031e+06	0.000418595	0.0910711
HILIC+	0.756	132.102	Amino acid C6H13NO2	Amino acid	3	-	-1.74072e+06	0.53861	0.993732	1.06835e+06	0.000442705	0.092665
RP+	9.655	269.209	Terpenoid C16H28O3		3	-	2.28728e+06	0.155835	0.993732	1.45082e+06	0.000466854	0.0955376
RP+	0.504	147.077	L-Glutamine	Amino acid	2	HMDB0000641	2.70204e+07	8.41044e-09	4.50194e-05	4.43301e+07	0.005386	0.360552
RP+	10.814	574.387	Unknown C37H51NO4		4		995669	1.02969e-10	6.88964e-07	808902	0.0219965	0.671925
RP−	9.487	380.222	Unknown C24H31NO3		4		556238	3.3075e-05	0.0268248	445587	0.0395327	0.80641
RP+	10.774	433.209	Unknown C24H30N2O4		4		-2.00657e+06	3.73457e-05	0.0282788	226322	0.221859	0.939427
HILIC+	0.384	265.216	Unknown C17H28O2		4		288954	4.17161e-05	0.0301754	101294	0.290741	0.941732
RP+	10.105	342.212	Unknown C18H31NO3S		4		-329170	1.57559e-11	2.10846e-07	-59819	0.399966	0.942579
RP+	13.509	790.571	PC O-38:7	Plasmalogen	2	-	-4470094	2.28842e-06	0.00360278	-514273	0.372768	0.942579
RP−	12.898	766.519	Unknown C40H78NO8P	Plasmalogen	4		-562319	2.47203e-05	0.0233122	-87201.3	0.346358	0.942579
RP+	4.244	1014.66	Unknown C54H95NO16		4		291688	4.13414e-07	0.00110646	109262	0.532513	0.945734
RP+	10.617	285.136	Unknown C14H20O6		4		-518830	1.08694e-07	0.000400488	134720	0.565388	0.946906
RP−	5.755	236.979	Unknown C6H7O8P		4		6.91771e+06	5.2057e-24	1.39325e-19	852832	0.617438	0.947562
RP+	11.067	449.154	Unknown C25H24N2O4S		4		7.78367e+06	3.32456e-06	0.00480997	-845346	0.902518	0.985129

## Sheet: Table S2
Protein.Ids	Protein.Names	Genes	First.Protein.Description	Log 2-fold difference	p-value
P32455;Q9H0R5	GBP1_HUMAN	GBP1	Guanylate-binding protein 1	5.60267	0.000448229
Q96AZ6	ISG20_HUMAN	ISG20	Interferon-stimulated gene 20 kDa protein	5.38177	1.48443e-05
O14879	IFIT3_HUMAN	IFIT3	Interferon-induced protein with tetratricopeptide repeats 3	5.00919	1.51399e-05
Q5VYY1	ANR22_HUMAN	ANKRD22	Ankyrin repeat domain-containing protein 22	4.9306	7.11944e-07
O95236	APOL3_HUMAN	APOL3	Apolipoprotein L3	4.84813	0.000186438
P30511	HLAF_HUMAN	HLA-F	HLA class I histocompatibility antigen, alpha chain F	4.74568	2.50212e-05
Q13077	TRAF1_HUMAN	TRAF1	TNF receptor-associated factor 1	4.59164	1.04152e-07
P29728	OAS2_HUMAN	OAS2	2'-5'-oligoadenylate synthase 2	4.52487	1.25647e-06
P10147	CCL3_HUMAN	CCL3	C-C motif chemokine 3	4.48437	0.0164546
P20591	MX1_HUMAN	MX1	Interferon-induced GTP-binding protein Mx1	4.47208	7.56394e-05
P01584	IL1B_HUMAN	IL1B	Interleukin-1 beta	4.38854	0.000534624
Q03169	TNAP2_HUMAN	TNFAIP2	Tumor necrosis factor alpha-induced protein 2	4.33225	3.03333e-08
P60201	MYPR_HUMAN	PLP1	Myelin proteolipid protein	4.24822	0.00268943
P09914	IFIT1_HUMAN	IFIT1	Interferon-induced protein with tetratricopeptide repeats 1	4.24328	4.55049e-05
P16070	CD44_HUMAN	CD44	CD44 antigen	4.23281	1.41232e-05
Q03519	TAP2_HUMAN	TAP2	Antigen peptide transporter 2	4.2159	3.64585e-09
Q03518	TAP1_HUMAN	TAP1	Antigen peptide transporter 1	4.19761	1.61757e-08
P09913	IFIT2_HUMAN	IFIT2	Interferon-induced protein with tetratricopeptide repeats 2	4.17981	5.64942e-07
P01889	HLAB_HUMAN	HLA-B	HLA class I histocompatibility antigen, B alpha chain	4.0776	5.09898e-07
P14902	I23O1_HUMAN	IDO1	Indoleamine 2,3-dioxygenase 1	3.99281	6.71808e-05
Q9C002	NMES1_HUMAN	NMES1	Normal mucosa of esophagus-specific gene 1 protein	3.89681	0.00213994
P04439	HLAA_HUMAN	HLA-A	HLA class I histocompatibility antigen, A alpha chain	3.88244	3.18598e-06
Q9NQ25	SLAF7_HUMAN	SLAMF7	SLAM family member 7	3.71906	1.14795e-08
P01893;P04439	HLAA_HUMAN;HLAH_HUMAN	HLA-H	Putative HLA class I histocompatibility antigen, alpha chain H	3.66967	7.81349e-06
Q8IVG5	SAM9L_HUMAN	SAMD9L	Sterile alpha motif domain-containing protein 9-like	3.38477	9.6646e-06
P23381	SYWC_HUMAN	WARS1	Tryptophan--tRNA ligase, cytoplasmic	3.34746	1.65165e-06
O75022	LIRB3_HUMAN	LILRB3	Leukocyte immunoglobulin-like receptor subfamily B member 3	3.28654	0.000116729
Q8N423	LIRB2_HUMAN	LILRB2	Leukocyte immunoglobulin-like receptor subfamily B member 2	3.27637	2.86673e-05
P42224	STAT1_HUMAN	STAT1	Signal transducer and activator of transcription 1-alpha/beta	3.23184	2.45354e-06
P33121	ACSL1_HUMAN	ACSL1	Long-chain-fatty-acid--CoA ligase 1	3.15238	1.11566e-06
Q8N8J7	F241A_HUMAN	FAM241A	Uncharacterized protein FAM241A	3.06021	1.34359e-05
P10321	HLAC_HUMAN	HLA-C	HLA class I histocompatibility antigen, C alpha chain	3.03212	1.45743e-05
Q96CV9	OPTN_HUMAN	OPTN	Optineurin	3.02577	0.000157273
P25942	TNR5_HUMAN	CD40	Tumor necrosis factor receptor superfamily member 5	3.00376	5.7712e-06
P05362	ICAM1_HUMAN	ICAM1	Intercellular adhesion molecule 1	3.00074	7.10527e-08
P30511;P01889;P10321;P01893;P04439	HLAA_HUMAN;HLAB_HUMAN;HLAC_HUMAN;HLAF_HUMAN;HLAH_HUMAN	HLA-B	HLA class I histocompatibility antigen, B alpha chain	2.99393	0.00024368
P05161	ISG15_HUMAN	ISG15	Ubiquitin-like protein ISG15	2.9812	2.54743e-06
O15533	TPSN_HUMAN	TAPBP	Tapasin	2.9589	3.59002e-06
O75558	STX11_HUMAN	STX11	Syntaxin-11	2.95649	1.55387e-05
P20592	MX2_HUMAN	MX2	Interferon-induced GTP-binding protein Mx2	2.93412	0.000373236
Q96J88	ESIP1_HUMAN	EPSTI1	Epithelial-stromal interaction protein 1	2.89728	0.000355707
Q9H1J7;P41221	WNT5A_HUMAN;WNT5B_HUMAN	WNT5A	Protein Wnt-5a	2.88472	0.000703645
Q00653	NFKB2_HUMAN	NFKB2	Nuclear factor NF-kappa-B p100 subunit	2.87283	2.34071e-08
P52333	JAK3_HUMAN	JAK3	Tyrosine-protein kinase JAK3	2.85779	5.2879e-07
Q9BYX4	IFIH1_HUMAN	IFIH1	Interferon-induced helicase C domain-containing protein 1	2.81438	7.00146e-06
Q01628;Q01629;P13164	IFM1_HUMAN;IFM2_HUMAN;IFM3_HUMAN	IFITM1	Interferon-induced transmembrane protein 1	2.76932	8.8813e-05
P53671	LIMK2_HUMAN	LIMK2	LIM domain kinase 2	2.76723	1.75785e-06
Q16548	B2LA1_HUMAN	BCL2A1	Bcl-2-related protein A1	2.74443	0.00445923
Q99685	MGLL_HUMAN	MGLL	Monoglyceride lipase	2.73755	0.000960223
Q9H3S1	SEM4A_HUMAN	SEMA4A	Semaphorin-4A	2.70586	0.000578146
Q96C10	DHX58_HUMAN	DHX58	Probable ATP-dependent RNA helicase DHX58	2.69836	1.58492e-05
Q9BQE5	APOL2_HUMAN	APOL2	Apolipoprotein L2	2.69215	9.97379e-07
P42081	CD86_HUMAN	CD86	T-lymphocyte activation antigen CD86	2.66127	8.746e-05
Q9Y617	SERC_HUMAN	PSAT1	Phosphoserine aminotransferase	2.64239	4.228e-05
P08567	PLEK_HUMAN	PLEK	Pleckstrin	2.59919	4.74542e-06
Q9Y5A7	NUB1_HUMAN	NUB1	NEDD8 ultimate buster 1	2.59592	4.5369e-07
P26951	IL3RA_HUMAN	IL3RA	Interleukin-3 receptor subunit alpha	2.59377	0.00465166
P04179	SODM_HUMAN	SOD2	Superoxide dismutase [Mn], mitochondrial	2.58887	5.18584e-06
O95786	DDX58_HUMAN	DDX58	Antiviral innate immune response receptor RIG-I	2.58842	3.64332e-06
Q9NRD1	FBX6_HUMAN	FBXO6	F-box only protein 6	2.57275	4.54493e-05
Q16719	KYNU_HUMAN	KYNU	Kynureninase	2.52169	3.31169e-05
P53004	BIEA_HUMAN	BLVRA	Biliverdin reductase A	2.50683	4.66065e-06
P00966	ASSY_HUMAN	ASS1	Argininosuccinate synthase	2.50037	0.0149242
P12931	SRC_HUMAN	SRC	Proto-oncogene tyrosine-protein kinase Src	2.49041	3.57368e-09
Q9Y6K5	OAS3_HUMAN	OAS3	2'-5'-oligoadenylate synthase 3	2.44895	5.12716e-06
Q15306	IRF4_HUMAN	IRF4	Interferon regulatory factor 4	2.4472	0.0130509
O60462	NRP2_HUMAN	NRP2	Neuropilin-2	2.43695	0.0104653
Q96CG3	TIFA_HUMAN	TIFA	TRAF-interacting protein with FHA domain-containing protein A	2.42917	0.000182552
O43353	RIPK2_HUMAN	RIPK2	Receptor-interacting serine/threonine-protein kinase 2	2.41092	7.83597e-08
Q13325	IFIT5_HUMAN	IFIT5	Interferon-induced protein with tetratricopeptide repeats 5	2.40383	7.48937e-06
Q9Y2D5	AKAP2_HUMAN	AKAP2	A-kinase anchor protein 2	2.39702	1.46042e-05
P18510	IL1RA_HUMAN	IL1RN	Interleukin-1 receptor antagonist protein	2.37994	0.000140214
P09326	CD48_HUMAN	CD48	CD48 antigen	2.36743	1.39837e-06
Q08AF3	SLFN5_HUMAN	SLFN5	Schlafen family member 5	2.3625	0.00141437
Q9NR97	TLR8_HUMAN	TLR8	Toll-like receptor 8	2.30818	0.00136704
P08243	ASNS_HUMAN	ASNS	Asparagine synthetase [glutamine-hydrolyzing]	2.2762	0.000687294
Q14872	MTF1_HUMAN	MTF1	Metal regulatory transcription factor 1	2.26963	0.00115976
P32189;Q14409	GLPK_HUMAN	GK	Glycerol kinase	2.25539	2.81038e-05
O14545	TRAD1_HUMAN	TRAFD1	TRAF-type zinc finger domain-containing protein 1	2.25096	3.62766e-06
O15553	MEFV_HUMAN	MEFV	Pyrin	2.24757	0.00112091
Q14410;P32189;Q14409	GLPK2_HUMAN;GLPK_HUMAN	GK	Glycerol kinase	2.22704	0.00116465
Q8WVV5;Q7KYR7	BT2A1_HUMAN	BTN2A1	Butyrophilin subfamily 2 member A1	2.21147	1.93014e-05
P43490	NAMPT_HUMAN	NAMPT	Nicotinamide phosphoribosyltransferase	2.21079	2.88339e-06
P17275	JUNB_HUMAN	JUNB	Transcription factor jun-B	2.20377	0.00295451
Q9UKJ1	PILRA_HUMAN	PILRA	Paired immunoglobulin-like type 2 receptor alpha	2.20091	2.65133e-06
P21580	TNAP3_HUMAN	TNFAIP3	Tumor necrosis factor alpha-induced protein 3	2.19296	8.45237e-08
O15229	KMO_HUMAN	KMO	Kynurenine 3-monooxygenase	2.1866	7.16859e-05
Q03405	UPAR_HUMAN	PLAUR	Urokinase plasminogen activator surface receptor	2.18547	0.000135884
P12931;P07947	SRC_HUMAN;YES_HUMAN	YES1	Tyrosine-protein kinase Yes	2.13354	7.4033e-06
Q3MIP1	IPIL2_HUMAN	ITPRIPL2	Inositol 1,4,5-trisphosphate receptor-interacting protein-like 2	2.11722	0.000110303
Q5S007	LRRK2_HUMAN	LRRK2	Leucine-rich repeat serine/threonine-protein kinase 2	2.1125	9.48415e-06
P10599	THIO_HUMAN	TXN	Thioredoxin	2.08026	2.67551e-06
Q9P2M7	CING_HUMAN	CGN	Cingulin	2.07237	0.00503511
O43175	SERA_HUMAN	PHGDH	D-3-phosphoglycerate dehydrogenase	2.04359	0.0139012
Q9Y2B5	VP9D1_HUMAN	VPS9D1	VPS9 domain-containing protein 1	2.04317	0.000282916
P61769	B2MG_HUMAN	B2M	Beta-2-microglobulin	2.04098	1.44237e-07
Q9BYK8	HELZ2_HUMAN	HELZ2	Helicase with zinc finger domain 2	2.03428	0.000748887
Q9H0P0	5NT3A_HUMAN	NT5C3A	Cytosolic 5'-nucleotidase 3A	2.03275	2.92949e-05
Q9H939	PPIP2_HUMAN	PSTPIP2	Proline-serine-threonine phosphatase-interacting protein 2	2.02759	0.00037987
P21333	FLNA_HUMAN	FLNA	Filamin-A	2.01799	0.0174065
P36222	CH3L1_HUMAN	CHI3L1	Chitinase-3-like protein 1	2.01276	0.000124996
Q96CP6	ASTRA_HUMAN	GRAMD1A	Protein Aster-A	2.00921	2.3567e-05
Q14699	RFTN1_HUMAN	RFTN1	Raftlin	1.99114	8.27953e-05
Q96F15	GIMA5_HUMAN	GIMAP5	GTPase IMAP family member 5	1.97865	4.90602e-05
Q9P0V8	SLAF8_HUMAN	SLAMF8	SLAM family member 8	1.97198	0.00246552
P19971	TYPH_HUMAN	TYMP	Thymidine phosphorylase	1.96476	4.46273e-05
Q9UNN8	EPCR_HUMAN	PROCR	Endothelial protein C receptor	1.96456	0.00893815
Q5EBM0	CMPK2_HUMAN	CMPK2	UMP-CMP kinase 2, mitochondrial	1.93274	1.63409e-05
Q01201	RELB_HUMAN	RELB	Transcription factor RelB	1.92468	4.35616e-06
Q9BXX0	EMIL2_HUMAN	EMILIN2	EMILIN-2	1.91235	0.000109371
Q8WZ64	ARAP2_HUMAN	ARAP2	Arf-GAP with Rho-GAP domain, ANK repeat and PH domain-containing protein 2	1.90322	0.000209687
Q2M385	MPEG1_HUMAN	MPEG1	Macrophage-expressed gene 1 protein	1.90145	0.000395058
P27701	CD82_HUMAN	CD82	CD82 antigen	1.85609	0.000104309
Q9H0Q0	CYRIA_HUMAN	CYRIA	CYFIP-related Rac1 interactor A	1.8502	0.000222983
Q8IY21	DDX60_HUMAN	DDX60	Probable ATP-dependent RNA helicase DDX60	1.84913	3.40157e-05
Q96S90;Q8IV50	LYSM2_HUMAN	LYSMD2	LysM and putative peptidoglycan-binding domain-containing protein 2	1.84438	2.10242e-05
Q9BXJ8	TACAN_HUMAN	TMEM120A	Ion channel TACAN	1.83074	0.000432562
Q9Y6N7	ROBO1_HUMAN	ROBO1	Roundabout homolog 1	1.82344	1.85542e-05
Q96AC1;Q9BQL6	FERM2_HUMAN	FERMT2	Fermitin family homolog 2	1.8193	0.0305016
Q92851	CASPA_HUMAN	CASP10	Caspase-10	1.81857	9.79117e-05
Q9UGQ3	GTR6_HUMAN	SLC2A6	Solute carrier family 2, facilitated glucose transporter member 6	1.81302	8.55342e-06
Q3SY69	AL1L2_HUMAN	ALDH1L2	Mitochondrial 10-formyltetrahydrofolate dehydrogenase	1.79653	0.00389347
P17931	LEG3_HUMAN	LGALS3	Galectin-3	1.7681	3.74585e-05
Q14162	SREC_HUMAN	SCARF1	Scavenger receptor class F member 1	1.76285	0.00299993
P25105	PTAFR_HUMAN	PTAFR	Platelet-activating factor receptor	1.75734	1.66992e-05
O75460	ERN1_HUMAN	ERN1	Serine/threonine-protein kinase/endoribonuclease IRE1	1.72329	1.13018e-05
P28838	AMPL_HUMAN	LAP3	Cytosol aminopeptidase	1.70475	0.000120152
P15529	MCP_HUMAN	CD46	Membrane cofactor protein	1.69163	0.000180952
Q00978	IRF9_HUMAN	IRF9	Interferon regulatory factor 9	1.68389	5.28599e-05
Q92570	NR4A3_HUMAN	NR4A3	Nuclear receptor subfamily 4 group A member 3	1.65014	0.0055572
P28065	PSB9_HUMAN	PSMB9	Proteasome subunit beta type-9	1.63932	8.08659e-05
Q92692	NECT2_HUMAN	NECTIN2	Nectin-2	1.63541	6.05963e-06
P55210	CASP7_HUMAN	CASP7	Caspase-7	1.62898	2.08611e-06
Q9ULG6	CCPG1_HUMAN	CCPG1	Cell cycle progression protein 1	1.62866	0.00517382
O15050	TRNK1_HUMAN	TRANK1	TPR and ankyrin repeat-containing protein 1	1.621	0.000388544
Q9GZQ8;A6NCE7;Q9H492	MLP3A_HUMAN	MAP1LC3A	Microtubule-associated proteins 1A/1B light chain 3A	1.61795	0.000429229
Q15293	RCN1_HUMAN	RCN1	Reticulocalbin-1	1.60402	7.36236e-06
P14384	CBPM_HUMAN	CPM	Carboxypeptidase M	1.59606	0.00315653
A6NI72;A8MVU1;P14598	NCF1B_HUMAN;NCF1C_HUMAN;NCF1_HUMAN	NCF1B	Putative neutrophil cytosol factor 1B	1.57782	0.000112679
Q63HN8	RN213_HUMAN	RNF213	E3 ubiquitin-protein ligase RNF213	1.57117	1.51968e-06
Q5SWH9	TMM69_HUMAN	TMEM69	Transmembrane protein 69	1.57065	0.0169358
Q86UF1	TSN33_HUMAN	TSPAN33	Tetraspanin-33	1.56435	0.0126426
A6NI73	LIRA5_HUMAN	LILRA5	Leukocyte immunoglobulin-like receptor subfamily A member 5	1.5596	0.00265673
Q9NQS5	GPR84_HUMAN	GPR84	G-protein coupled receptor 84	1.55303	2.96931e-05
Q9UDY2	ZO2_HUMAN	TJP2	Tight junction protein ZO-2	1.54676	0.0173222
Q9UII4	HERC5_HUMAN	HERC5	E3 ISG15--protein ligase HERC5	1.54465	0.000199282
Q6ICB0	DESI1_HUMAN	DESI1	Desumoylating isopeptidase 1	1.53581	0.0334136
P18031	PTN1_HUMAN	PTPN1	Tyrosine-protein phosphatase non-receptor type 1	1.53102	2.04234e-05
P12429	ANXA3_HUMAN	ANXA3	Annexin A3	1.52369	0.00364418
Q7Z3E5	ARMC9_HUMAN	ARMC9	LisH domain-containing protein ARMC9	1.51953	0.0116854
O14936	CSKP_HUMAN	CASK	Peripheral plasma membrane protein CASK	1.51744	9.38111e-05
P58004	SESN2_HUMAN	SESN2	Sestrin-2	1.50704	0.000216675
Q96FJ0	STALP_HUMAN	STAMBPL1	AMSH-like protease	1.50684	0.000106985
Q8N128	F177A_HUMAN	FAM177A1	Protein FAM177A1	1.50315	0.000170905
A6NI72;A8MVU1;P14598	NCF1_HUMAN	NCF1	Neutrophil cytosol factor 1	1.49976	0.000460535
O94885	SASH1_HUMAN	SASH1	SAM and SH3 domain-containing protein 1	1.49857	6.47672e-05
Q99572	P2RX7_HUMAN	P2RX7	P2X purinoceptor 7	1.4981	0.0046134
O94916	NFAT5_HUMAN	NFAT5	Nuclear factor of activated T-cells 5	1.49043	6.11267e-05
P25445	TNR6_HUMAN	FAS	Tumor necrosis factor receptor superfamily member 6	1.4895	8.17682e-06
P15291	B4GT1_HUMAN	B4GALT1	Beta-1,4-galactosyltransferase 1	1.48431	1.46679e-05
Q8IXQ6	PARP9_HUMAN	PARP9	Protein mono-ADP-ribosyltransferase PARP9	1.48035	1.17777e-05
Q15642	CIP4_HUMAN	TRIP10	Cdc42-interacting protein 4	1.47899	0.000796876
P13747	HLAE_HUMAN	HLA-E	HLA class I histocompatibility antigen, alpha chain E	1.47514	0.00440874
Q9Y696	CLIC4_HUMAN	CLIC4	Chloride intracellular channel protein 4	1.47244	0.00136835
Q9BRQ8	FSP1_HUMAN	AIFM2	Ferroptosis suppressor protein 1	1.46835	0.00139239
Q9UPI3	FLVC2_HUMAN	FLVCR2	Feline leukemia virus subgroup C receptor-related protein 2	1.46761	0.00548807
Q11201	SIA4A_HUMAN	ST3GAL1	CMP-N-acetylneuraminate-beta-galactosamide-alpha-2,3-sialyltransferase 1	1.46721	0.00927156
Q9NPF2	CHSTB_HUMAN	CHST11	Carbohydrate sulfotransferase 11	1.46376	0.00287743
Q9H665	IGFR1_HUMAN	IGFLR1	IGF-like family receptor 1	1.46348	0.00406939
P25774	CATS_HUMAN	CTSS	Cathepsin S	1.45828	0.00255983
Q96RD7	PANX1_HUMAN	PANX1	Pannexin-1	1.45649	0.00038834
P48065	S6A12_HUMAN	SLC6A12	Sodium- and chloride-dependent betaine transporter	1.45563	0.00584319
Q969P0	IGSF8_HUMAN	IGSF8	Immunoglobulin superfamily member 8	1.45324	0.00488362
Q13506	NAB1_HUMAN	NAB1	NGFI-A-binding protein 1	1.44809	0.00190546
Q8TDB6	DTX3L_HUMAN	DTX3L	E3 ubiquitin-protein ligase DTX3L	1.44606	9.81814e-06
A6NI72;P14598	NCF1B_HUMAN;NCF1_HUMAN	NCF1B	Putative neutrophil cytosol factor 1B	1.44265	0.000163535
Q92844	TANK_HUMAN	TANK	TRAF family member-associated NF-kappa-B activator	1.4408	0.000137052
P52630	STAT2_HUMAN	STAT2	Signal transducer and activator of transcription 2	1.43738	0.000419032
Q9HC16	ABC3G_HUMAN	APOBEC3G	DNA dC->dU-editing enzyme APOBEC-3G	1.43509	3.15441e-05
O15162	PLS1_HUMAN	PLSCR1	Phospholipid scramblase 1	1.43314	6.08714e-05
P19525	E2AK2_HUMAN	EIF2AK2	Interferon-induced, double-stranded RNA-activated protein kinase	1.42894	2.29965e-05
O14933	UB2L6_HUMAN	UBE2L6	Ubiquitin/ISG15-conjugating enzyme E2 L6	1.42754	0.00531348
P15822	ZEP1_HUMAN	HIVEP1	Zinc finger protein 40	1.42711	0.0151608
P29966	MARCS_HUMAN	MARCKS	Myristoylated alanine-rich C-kinase substrate	1.42097	3.91417e-07
P13995	MTDC_HUMAN	MTHFD2	Bifunctional methylenetetrahydrofolate dehydrogenase/cyclohydrolase, mitochondrial	1.41932	0.000201493
Q6IQ26;Q6ZUT9	DEN5A_HUMAN;DEN5B_HUMAN	DENND5A	DENN domain-containing protein 5A	1.4083	0.000707215
Q8NBJ4	GOLM1_HUMAN	GOLM1	Golgi membrane protein 1	1.39042	0.00833097
P60903	S10AA_HUMAN	S100A10	Protein S100-A10	1.37867	0.0157417
Q96NA2	RILP_HUMAN	RILP	Rab-interacting lysosomal protein	1.37354	0.00144882
P41162	ETV3_HUMAN	ETV3	ETS translocation variant 3	1.36675	2.20713e-05
P80723	BASP1_HUMAN	BASP1	Brain acid soluble protein 1	1.3633	0.00150856
Q53GL7	PAR10_HUMAN	PARP10	Protein mono-ADP-ribosyltransferase PARP10	1.36116	0.000938382
Q86YB8	ERO1B_HUMAN	ERO1B	ERO1-like protein beta	1.35828	4.34061e-05
P17676	CEBPB_HUMAN	CEBPB	CCAAT/enhancer-binding protein beta	1.35027	0.00100566
Q9NSI8	SAMN1_HUMAN	SAMSN1	SAM domain-containing protein SAMSN-1	1.34754	5.9652e-05
Q14764	MVP_HUMAN	MVP	Major vault protein	1.34625	3.70122e-05
P00973	OAS1_HUMAN	OAS1	2'-5'-oligoadenylate synthase 1	1.33272	0.0377908
P42229	STA5A_HUMAN	STAT5A	Signal transducer and activator of transcription 5A	1.32909	1.98317e-05
Q9NRL2	BAZ1A_HUMAN	BAZ1A	Bromodomain adjacent to zinc finger domain protein 1A	1.32563	0.000349908
Q92968	PEX13_HUMAN	PEX13	Peroxisomal membrane protein PEX13	1.32528	0.00162595
Q9BQE4	SELS_HUMAN	SELENOS	Selenoprotein S	1.32515	0.000544146
A1A4S6	RHG10_HUMAN	ARHGAP10	Rho GTPase-activating protein 10	1.32145	0.0414799
Q9ULC5	ACSL5_HUMAN	ACSL5	Long-chain-fatty-acid--CoA ligase 5	1.32022	8.80969e-05
Q9Y5X0	SNX10_HUMAN	SNX10	Sorting nexin-10	1.31759	0.00680494
Q6IQ26	DEN5A_HUMAN	DENND5A	DENN domain-containing protein 5A	1.31179	3.4708e-05
B0I1T2	MYO1G_HUMAN	MYO1G	Unconventional myosin-Ig	1.31037	0.000275776
P00813	ADA_HUMAN	ADA	Adenosine deaminase	1.30864	0.00101475
Q9BX10	GTPB2_HUMAN	GTPBP2	GTP-binding protein 2	1.30814	0.000516841
P49662	CASP4_HUMAN	CASP4	Caspase-4	1.30641	0.0049513
Q5K651	SAMD9_HUMAN	SAMD9	Sterile alpha motif domain-containing protein 9	1.30411	0.000463472
P80217	IN35_HUMAN	IFI35	Interferon-induced 35 kDa protein	1.30272	2.16293e-05
Q86XR7	TCAM2_HUMAN	TICAM2	TIR domain-containing adapter molecule 2	1.29982	0.00391316
O00458	IFRD1_HUMAN	IFRD1	Interferon-related developmental regulator 1	1.29188	0.00676262
Q06210;O94808	GFPT1_HUMAN;GFPT2_HUMAN	GFPT2	Glutamine--fructose-6-phosphate aminotransferase [isomerizing] 2	1.28564	0.0011953
Q06210	GFPT1_HUMAN	GFPT1	Glutamine--fructose-6-phosphate aminotransferase [isomerizing] 1	1.28457	1.21084e-06
O14807	RASM_HUMAN	MRAS	Ras-related protein M-Ras	1.28295	0.00396258
Q9Y4K1	CRBG1_HUMAN	CRYBG1	Beta/gamma crystallin domain-containing protein 1	1.28271	0.000554083
Q15758	AAAT_HUMAN	SLC1A5	Neutral amino acid transporter B(0)	1.27585	0.000983933
Q8WWX9	SELM_HUMAN	SELENOM	Selenoprotein M	1.26274	3.76639e-05
O14657	TOR1B_HUMAN	TOR1B	Torsin-1B	1.26206	0.00342213
P23508	CRCM_HUMAN	MCC	Colorectal mutant cancer protein	1.26182	0.0100504
Q6ZRI6	CO039_HUMAN	C15orf39	Uncharacterized protein C15orf39	1.2612	0.000135312
P10301	RRAS_HUMAN	RRAS	Ras-related protein R-Ras	1.2602	0.000548682
Q13671	RIN1_HUMAN	RIN1	Ras and Rab interactor 1	1.25406	0.000122485
O94768	ST17B_HUMAN	STK17B	Serine/threonine-protein kinase 17B	1.25344	0.0347113
Q8NEL9	DDHD1_HUMAN	DDHD1	Phospholipase DDHD1	1.25342	0.000181783
Q53EP0	FND3B_HUMAN	FNDC3B	Fibronectin type III domain-containing protein 3B	1.24965	0.00134264
Q9UPU7	TBD2B_HUMAN	TBC1D2B	TBC1 domain family member 2B	1.24947	0.000624243
Q460N5	PAR14_HUMAN	PARP14	Protein mono-ADP-ribosyltransferase PARP14	1.24602	0.000146648
P22794	EVI2A_HUMAN	EVI2A	Protein EVI2A	1.24016	0.00163942
Q99788	CML1_HUMAN	CMKLR1	Chemerin-like receptor 1	1.23989	0.000641338
P08631	HCK_HUMAN	HCK	Tyrosine-protein kinase HCK	1.23198	1.3817e-06
Q13501	SQSTM_HUMAN	SQSTM1	Sequestosome-1	1.22762	0.00268067
Q9BUV8	RCAF1_HUMAN	RAB5IF	Respirasome Complex Assembly Factor 1	1.22719	0.0112454
Q92879	CELF1_HUMAN	CELF1	CUGBP Elav-like family member 1	1.22688	0.000146779
Q9Y4G8	RPGF2_HUMAN	RAPGEF2	Rap guanine nucleotide exchange factor 2	1.22373	8.46808e-05
Q13451	FKBP5_HUMAN	FKBP5	Peptidyl-prolyl cis-trans isomerase FKBP5	1.22175	0.000351137
P19838	NFKB1_HUMAN	NFKB1	Nuclear factor NF-kappa-B p105 subunit	1.20959	1.05387e-05
P25963	IKBA_HUMAN	NFKBIA	NF-kappa-B inhibitor alpha	1.20938	0.000141651
Q9UBU6	FA8A1_HUMAN	FAM8A1	Protein FAM8A1	1.20933	0.00467896
Q96QK8	SIM14_HUMAN	SMIM14	Small integral membrane protein 14	1.20876	0.0134766
Q9UGJ0	AAKG2_HUMAN	PRKAG2	5'-AMP-activated protein kinase subunit gamma-2	1.19861	0.000380903
Q9Y3L5	RAP2C_HUMAN	RAP2C	Ras-related protein Rap-2c	1.19305	0.00238658
O75976	CBPD_HUMAN	CPD	Carboxypeptidase D	1.19193	0.000681253
Q5BJD5	TM41B_HUMAN	TMEM41B	Transmembrane protein 41B	1.19105	0.00247594
Q13287	NMI_HUMAN	NMI	N-myc-interactor	1.18242	0.000293123
Q9NZR1	TMOD2_HUMAN	TMOD2	Tropomodulin-2	1.1821	3.36828e-05
Q9Y4H2	IRS2_HUMAN	IRS2	Insulin receptor substrate 2	1.17934	0.00597083
Q07820	MCL1_HUMAN	MCL1	Induced myeloid leukemia cell differentiation protein Mcl-1	1.17302	5.33522e-06
Q9UKE5	TNIK_HUMAN	TNIK	TRAF2 and NCK-interacting protein kinase	1.16221	0.0328028
Q92604	LGAT1_HUMAN	LPGAT1	Acyl-CoA:lysophosphatidylglycerol acyltransferase 1	1.15035	0.000328164
Q5D1E8	ZC12A_HUMAN	ZC3H12A	Endoribonuclease ZC3H12A	1.14402	0.00628821
Q96KC8	DNJC1_HUMAN	DNAJC1	DnaJ homolog subfamily C member 1	1.14314	2.46983e-05
P51878	CASP5_HUMAN	CASP5	Caspase-5	1.13975	0.0148241
Q86XZ4	SPAS2_HUMAN	SPATS2	Spermatogenesis-associated serine-rich protein 2	1.13802	0.0123211
Q8IZP0	ABI1_HUMAN	ABI1	Abl interactor 1	1.13523	2.24172e-05
A8MVS5	HIDE1_HUMAN	HIDE1	Protein HIDE1	1.13432	0.00120815
Q8ND71	GIMA8_HUMAN	GIMAP8	GTPase IMAP family member 8	1.13418	8.76475e-05
P58005;P58004	SESN2_HUMAN;SESN3_HUMAN	SESN2	Sestrin-2	1.13239	0.000197934
Q8IWU2	LMTK2_HUMAN	LMTK2	Serine/threonine-protein kinase LMTK2	1.13225	0.00150598
Q8NBZ7	UXS1_HUMAN	UXS1	UDP-glucuronic acid decarboxylase 1	1.12716	0.00523842
Q9H4M9	EHD1_HUMAN	EHD1	EH domain-containing protein 1	1.12264	0.0053819
Q86Y07	VRK2_HUMAN	VRK2	Serine/threonine-protein kinase VRK2	1.12096	8.00683e-05
O95379	TFIP8_HUMAN	TNFAIP8	Tumor necrosis factor alpha-induced protein 8	1.11777	0.000833349
Q92622	RUBIC_HUMAN	RUBCN	Run domain Beclin-1-interacting and cysteine-rich domain-containing protein	1.11428	9.45216e-05
P07947	YES_HUMAN	YES1	Tyrosine-protein kinase Yes	1.11285	0.0421412
Q9Y5W9	SNX11_HUMAN	SNX11	Sorting nexin-11	1.11182	0.000224075
Q13114	TRAF3_HUMAN	TRAF3	TNF receptor-associated factor 3	1.10587	0.0021637
Q8N0X7	SPART_HUMAN	SPART	Spartin	1.10456	0.000238485
Q8IZH2	XRN1_HUMAN	XRN1	5'-3' exoribonuclease 1	1.10016	1.66289e-06
Q9HB58	SP110_HUMAN	SP110	Sp110 nuclear body protein	1.09526	0.000220239
P29590	PML_HUMAN	PML	Protein PML	1.09263	0.000333512
Q9H1U4	MEGF9_HUMAN	MEGF9	Multiple epidermal growth factor-like domains protein 9	1.09146	0.00392431
Q92611	EDEM1_HUMAN	EDEM1	ER degradation-enhancing alpha-mannosidase-like protein 1	1.09057	0.00110568
Q6ZUJ8	BCAP_HUMAN	PIK3AP1	Phosphoinositide 3-kinase adapter protein 1	1.08816	0.00362734
P46527	CDN1B_HUMAN	CDKN1B	Cyclin-dependent kinase inhibitor 1B	1.08471	0.00444915
Q9H0J9	PAR12_HUMAN	PARP12	Protein mono-ADP-ribosyltransferase PARP12	1.07351	2.10046e-05
Q08722	CD47_HUMAN	CD47	Leukocyte surface antigen CD47	1.07094	0.0360904
Q5H9U9	DDX6L_HUMAN	DDX60L	Probable ATP-dependent RNA helicase DDX60-like	1.07042	0.00267865
Q9P289	STK26_HUMAN	STK26	Serine/threonine-protein kinase 26	1.0691	0.00303138
Q9UL46	PSME2_HUMAN	PSME2	Proteasome activator complex subunit 2	1.06894	0.00433594
Q9NXH8	TOR4A_HUMAN	TOR4A	Torsin-4A	1.06408	1.44497e-06
Q14314	FGL2_HUMAN	FGL2	Fibroleukin	1.05884	0.0101201
Q04864	REL_HUMAN	REL	Proto-oncogene c-Rel	1.05651	5.36075e-05
Q8NB16	MLKL_HUMAN	MLKL	Mixed lineage kinase domain-like protein	1.05497	0.00104065
P50453	SPB9_HUMAN	SERPINB9	Serpin B9	1.05124	0.00414239
A0AV96	RBM47_HUMAN	RBM47	RNA-binding protein 47	1.05119	0.000136931
Q6ICH7	ASPH2_HUMAN	ASPHD2	Aspartate beta-hydroxylase domain-containing protein 2	1.04632	0.0127159
Q8WUD1	RAB2B_HUMAN	RAB2B	Ras-related protein Rab-2B	1.04612	0.000495487
P17707	DCAM_HUMAN	AMD1	S-adenosylmethionine decarboxylase proenzyme	1.04578	0.00929174
Q8N4C8	MINK1_HUMAN	MINK1	Misshapen-like kinase 1	1.04314	8.78352e-05
P15104	GLNA_HUMAN	GLUL	Glutamine synthetase	1.03987	0.0157488
P31689	DNJA1_HUMAN	DNAJA1	DnaJ homolog subfamily A member 1	1.03916	5.07189e-05
Q66GS9	CP135_HUMAN	CEP135	Centrosomal protein of 135 kDa	1.03799	0.00111422
Q9Y4C5	CHST2_HUMAN	CHST2	Carbohydrate sulfotransferase 2	1.03695	0.0019556
Q9H1C7	CYTM1_HUMAN	CYSTM1	Cysteine-rich and transmembrane domain-containing protein 1	1.0337	0.0396719
Q86UW9	DTX2_HUMAN	DTX2	Probable E3 ubiquitin-protein ligase DTX2	1.03059	4.61929e-05
Q96EQ0	SGTB_HUMAN	SGTB	Small glutamine-rich tetratricopeptide repeat-containing protein beta	1.02439	0.000975958
Q8NF64	ZMIZ2_HUMAN	ZMIZ2	Zinc finger MIZ domain-containing protein 2	1.02254	0.00120793
P48507	GSH0_HUMAN	GCLM	Glutamate--cysteine ligase regulatory subunit	1.02118	0.00580918
Q9NRR3	C42S2_HUMAN	CDC42SE2	CDC42 small effector protein 2	1.01954	0.0120365
Q8TEB9	RHBL4_HUMAN	RHBDD1	Rhomboid-related protein 4	1.0104	0.0249351
Q96AQ6	PBIP1_HUMAN	PBXIP1	Pre-B-cell leukemia transcription factor-interacting protein 1	1.00951	0.000524074
O00241;P78324	SHPS1_HUMAN;SIRB1_HUMAN	SIRPB1	Signal-regulatory protein beta-1	1.00868	1.87334e-05
O60674	JAK2_HUMAN	JAK2	Tyrosine-protein kinase JAK2	1.00788	4.14296e-08
Q9BZQ8	NIBA1_HUMAN	NIBAN1	Protein Niban 1	1.00604	0.00480578
Q7Z4F1	LRP10_HUMAN	LRP10	Low-density lipoprotein receptor-related protein 10	1.00544	0.000917706
P17535	JUND_HUMAN	JUND	Transcription factor jun-D	1.00305	0.00637811
O00750	P3C2B_HUMAN	PIK3C2B	Phosphatidylinositol 4-phosphate 3-kinase C2 domain-containing subunit beta	-0.998113	9.79569e-05
O15446	RPA34_HUMAN	POLR1G	DNA-directed RNA polymerase I subunit RPA34	-1.00157	0.00504394
Q9BUA3	SPNDC_HUMAN	SPINDOC	Spindlin interactor and repressor of chromatin-binding protein	-1.00171	0.0324896
Q68D06;Q7Z7L1	SLN11_HUMAN;SLN13_HUMAN	SLFN13	Schlafen family member 13	-1.00399	0.00803342
O00461	GOLI4_HUMAN	GOLIM4	Golgi integral membrane protein 4	-1.00433	0.000742074
P36941	TNR3_HUMAN	LTBR	Tumor necrosis factor receptor superfamily member 3	-1.00599	0.0134354
P11474	ERR1_HUMAN	ESRRA	Steroid hormone receptor ERR1	-1.006	0.0134477
Q9ULR3	PPM1H_HUMAN	PPM1H	Protein phosphatase 1H	-1.00909	0.00190982
Q8TB40	ABHD4_HUMAN	ABHD4	(Lyso)-N-acylphosphatidylethanolamine lipase	-1.00995	0.000277685
Q9NX38	ABITM_HUMAN	ABITRAM	Protein Abitram	-1.01163	0.0105587
Q9C0H2	TTYH3_HUMAN	TTYH3	Protein tweety homolog 3	-1.013	0.000160414
Q15059	BRD3_HUMAN	BRD3	Bromodomain-containing protein 3	-1.01333	0.000116943
Q96GX2	A7L3B_HUMAN	ATXN7L3B	Ataxin-7-like protein 3B	-1.01527	0.0018327
P57076	CF298_HUMAN	CFAP298	Cilia- and flagella-associated protein 298	-1.01548	0.0125166
Q9H0Z9	RBM38_HUMAN	RBM38	RNA-binding protein 38	-1.01575	0.0129674
P18887	XRCC1_HUMAN	XRCC1	DNA repair protein XRCC1	-1.01804	9.37222e-05
Q9NX62	IMPA3_HUMAN	BPNT2	Golgi-resident adenosine 3',5'-bisphosphate 3'-phosphatase	-1.02347	0.00372827
O75882	ATRN_HUMAN	ATRN	Attractin	-1.02566	4.50411e-06
A6NHX0	CAST2_HUMAN	CASTOR2	Cytosolic arginine sensor for mTORC1 subunit 2	-1.03103	0.00290877
O75815	BCAR3_HUMAN	BCAR3	Breast cancer anti-estrogen resistance protein 3	-1.03313	0.00745508
O14924	RGS12_HUMAN	RGS12	Regulator of G-protein signaling 12	-1.03325	5.35508e-05
P45973	CBX5_HUMAN	CBX5	Chromobox protein homolog 5	-1.03619	0.00048128
Q13330	MTA1_HUMAN	MTA1	Metastasis-associated protein MTA1	-1.03977	6.09764e-05
P26010	ITB7_HUMAN	ITGB7	Integrin beta-7	-1.04355	0.00542337
Q6PJG6	BRAT1_HUMAN	BRAT1	BRCA1-associated ATM activator 1	-1.04357	2.83824e-05
Q9BQC3	DPH2_HUMAN	DPH2	2-(3-amino-3-carboxypropyl)histidine synthase subunit 2	-1.04586	0.00697242
Q8WWN9;G9CGD6	ICEF1_HUMAN	IPCEF1	Interactor protein for cytohesin exchange factors 1	-1.04903	0.00166769
P02686	MBP_HUMAN	MBP	Myelin basic protein	-1.05165	2.46462e-05
P54802	ANAG_HUMAN	NAGLU	Alpha-N-acetylglucosaminidase	-1.05352	0.00115786
Q9NQ55	SSF1_HUMAN	PPAN	Suppressor of SWI4 1 homolog	-1.06687	0.0273241
Q01543	FLI1_HUMAN	FLI1	Friend leukemia integration 1 transcription factor	-1.06924	0.00491171
Q9NWY4;A8MVJ9	HPF1_HUMAN	HPF1	Histone PARylation factor 1	-1.07143	0.000120871
Q15797;Q99717	SMAD1_HUMAN;SMAD5_HUMAN	SMAD1	Mothers against decapentaplegic homolog 1	-1.07417	0.00652043
P18084	ITB5_HUMAN	ITGB5	Integrin beta-5	-1.0793	0.00209623
P18858	DNLI1_HUMAN	LIG1	DNA ligase 1	-1.08092	0.00566774
Q08117	TLE5_HUMAN	TLE5	TLE family member 5	-1.08639	0.00103434
Q9Y237	PIN4_HUMAN	PIN4	Peptidyl-prolyl cis-trans isomerase NIMA-interacting 4	-1.08919	0.0100156
Q8IU68	TMC8_HUMAN	TMC8	Transmembrane channel-like protein 8	-1.09082	0.00157579
Q13813	SPTN1_HUMAN	SPTAN1	Spectrin alpha chain, non-erythrocytic 1	-1.09381	0.0019599
O00418	EF2K_HUMAN	EEF2K	Eukaryotic elongation factor 2 kinase	-1.09484	0.0017494
Q5TCZ1	SPD2A_HUMAN	SH3PXD2A	SH3 and PX domain-containing protein 2A	-1.09755	0.00411493
Q9Y4C1	KDM3A_HUMAN	KDM3A	Lysine-specific demethylase 3A	-1.10389	0.0092385
Q8NI60	COQ8A_HUMAN	COQ8A	Atypical kinase COQ8A, mitochondrial	-1.10632	0.00267545
P16278	BGAL_HUMAN	GLB1	Beta-galactosidase	-1.1072	0.0240394
Q9C0B1	FTO_HUMAN	FTO	Alpha-ketoglutarate-dependent dioxygenase FTO	-1.10737	0.0012217
Q2KHR3	QSER1_HUMAN	QSER1	Glutamine and serine-rich protein 1	-1.11002	0.00858868
Q14761	PTCA_HUMAN	PTPRCAP	Protein tyrosine phosphatase receptor type C-associated protein	-1.1148	0.0185888
P09874	PARP1_HUMAN	PARP1	Poly [ADP-ribose] polymerase 1	-1.12191	0.00322157
Q9UHL4	DPP2_HUMAN	DPP7	Dipeptidyl peptidase 2	-1.12235	0.00411106
Q7L266	ASGL1_HUMAN	ASRGL1	Isoaspartyl peptidase/L-asparaginase	-1.12585	0.00192467
Q8N292	GAPT_HUMAN	GAPT	Protein GAPT	-1.13	0.000539199
Q9BRX5	PSF3_HUMAN	GINS3	DNA replication complex GINS protein PSF3	-1.13518	0.029486
P50897	PPT1_HUMAN	PPT1	Palmitoyl-protein thioesterase 1	-1.14212	0.00602841
Q96B54	ZN428_HUMAN	ZNF428	Zinc finger protein 428	-1.14546	0.000803736
Q15119	PDK2_HUMAN	PDK2	[Pyruvate dehydrogenase (acetyl-transferring)] kinase isozyme 2, mitochondrial	-1.14603	0.00577197
Q9Y5B9	SP16H_HUMAN	SUPT16H	FACT complex subunit SPT16	-1.14797	0.00200922
Q8IV61	GRP3_HUMAN	RASGRP3	Ras guanyl-releasing protein 3	-1.15251	0.000143045
Q68CP4	HGNAT_HUMAN	HGSNAT	Heparan-alpha-glucosaminide N-acetyltransferase	-1.15567	0.00947135
Q08945	SSRP1_HUMAN	SSRP1	FACT complex subunit SSRP1	-1.1581	0.00088974
Q9H7E9	CH033_HUMAN	C8orf33	UPF0488 protein C8orf33	-1.16408	0.000954344
P22732	GTR5_HUMAN	SLC2A5	Solute carrier family 2, facilitated glucose transporter member 5	-1.16728	0.00475342
Q8TBN0	R3GEF_HUMAN	RAB3IL1	Guanine nucleotide exchange factor for Rab-3A	-1.16783	0.00980447
Q8N4N3	KLH36_HUMAN	KLHL36	Kelch-like protein 36	-1.16924	0.0148178
Q5T0D9	TPRGL_HUMAN	TPRG1L	Tumor protein p63-regulated gene 1-like protein	-1.1722	0.00492099
Q8IXU6	S35F2_HUMAN	SLC35F2	Solute carrier family 35 member F2	-1.17826	0.00819628
Q9BT23	LIMD2_HUMAN	LIMD2	LIM domain-containing protein 2	-1.18342	0.00359047
Q8N4Z0	RAB42_HUMAN	RAB42	Ras-related protein Rab-42	-1.1887	0.00223378
P15907	SIAT1_HUMAN	ST6GAL1	Beta-galactoside alpha-2,6-sialyltransferase 1	-1.18872	0.000459476
Q86XI2	CNDG2_HUMAN	NCAPG2	Condensin-2 complex subunit G2	-1.19057	0.0139133
P29372	3MG_HUMAN	MPG	DNA-3-methyladenine glycosylase	-1.19347	0.000274323
Q9BW71	HIRP3_HUMAN	HIRIP3	HIRA-interacting protein 3	-1.20313	0.000107892
P19793	RXRA_HUMAN	RXRA	Retinoic acid receptor RXR-alpha	-1.20836	0.0368076
Q9NVU0	RPC5_HUMAN	POLR3E	DNA-directed RNA polymerase III subunit RPC5	-1.20853	0.000294437
P78347	GTF2I_HUMAN	GTF2I	General transcription factor II-I	-1.2092	3.58649e-06
Q7Z6J9	SEN54_HUMAN	TSEN54	tRNA-splicing endonuclease subunit Sen54	-1.21357	0.010313
Q8N414	PGBD5_HUMAN	PGBD5	PiggyBac transposable element-derived protein 5	-1.21755	9.30649e-06
O75676	KS6A4_HUMAN	RPS6KA4	Ribosomal protein S6 kinase alpha-4	-1.22155	3.08728e-07
Q96G91	P2Y11_HUMAN	P2RY11	P2Y purinoceptor 11	-1.22344	0.00255743
P01024	CO3_HUMAN	C3	Complement C3	-1.22422	0.000503647
P48060	GLIP1_HUMAN	GLIPR1	Glioma pathogenesis-related protein 1	-1.23275	0.00084824
Q969T9	WBP2_HUMAN	WBP2	WW domain-binding protein 2	-1.23869	0.00473059
Q01082	SPTB2_HUMAN	SPTBN1	Spectrin beta chain, non-erythrocytic 1	-1.24617	0.00115837
Q9HC52	CBX8_HUMAN	CBX8	Chromobox protein homolog 8	-1.24764	0.0161584
P04066	FUCO_HUMAN	FUCA1	Tissue alpha-L-fucosidase	-1.24997	0.000515939
Q09328	MGT5A_HUMAN	MGAT5	Alpha-1,6-mannosylglycoprotein 6-beta-N-acetylglucosaminyltransferase A	-1.25868	0.00446898
P00374	DYR_HUMAN	DHFR	Dihydrofolate reductase	-1.2649	0.002811
Q86U70	LDB1_HUMAN	LDB1	LIM domain-binding protein 1	-1.26553	0.000853546
Q53EL6	PDCD4_HUMAN	PDCD4	Programmed cell death protein 4	-1.26955	0.000973006
Q8NHP8	PLBL2_HUMAN	PLBD2	Putative phospholipase B-like 2	-1.27317	0.00026925
Q6PIJ6	FBX38_HUMAN	FBXO38	F-box only protein 38	-1.27992	0.000757236
P09884	DPOLA_HUMAN	POLA1	DNA polymerase alpha catalytic subunit	-1.28494	0.0322597
Q56VL3	OCAD2_HUMAN	OCIAD2	OCIA domain-containing protein 2	-1.28559	0.00261179
Q8N954	GPT11_HUMAN	GPATCH11	G patch domain-containing protein 11	-1.28744	0.000546033
Q04726	TLE3_HUMAN	TLE3	Transducin-like enhancer protein 3	-1.29035	2.59918e-08
Q6P1Q9	MET2B_HUMAN	METTL2B	tRNA N(3)-methylcytidine methyltransferase METTL2B	-1.29464	0.0124324
O00182	LEG9_HUMAN	LGALS9	Galectin-9	-1.29664	0.0471661
Q9BV57	MTND_HUMAN	ADI1	1,2-dihydroxy-3-keto-5-methylthiopentene dioxygenase	-1.29688	5.80755e-05
Q02078	MEF2A_HUMAN	MEF2A	Myocyte-specific enhancer factor 2A	-1.30155	0.00900394
Q9Y294	ASF1A_HUMAN	ASF1A	Histone chaperone ASF1A	-1.30937	1.57213e-05
Q9UPC5	GPR34_HUMAN	GPR34	Probable G-protein coupled receptor 34	-1.31287	0.000841992
P06493	CDK1_HUMAN	CDK1	Cyclin-dependent kinase 1	-1.31573	0.00690561
Q96DT0	LEG12_HUMAN	LGALS12	Galectin-12	-1.31799	0.00290459
Q9NQ75	CASS4_HUMAN	CASS4	Cas scaffolding protein family member 4	-1.32059	0.00343196
Q9BTY2	FUCO2_HUMAN	FUCA2	Plasma alpha-L-fucosidase	-1.32242	1.95603e-05
P23229	ITA6_HUMAN	ITGA6	Integrin alpha-6	-1.32551	0.0111413
P56557	TM50B_HUMAN	TMEM50B	Transmembrane protein 50B	-1.32708	0.00122313
P13612	ITA4_HUMAN	ITGA4	Integrin alpha-4	-1.32837	0.00267943
P09601	HMOX1_HUMAN	HMOX1	Heme oxygenase 1	-1.32914	4.26078e-07
P16455	MGMT_HUMAN	MGMT	Methylated-DNA--protein-cysteine methyltransferase	-1.34701	0.000527277
Q9GZU1	MCLN1_HUMAN	MCOLN1	Mucolipin-1	-1.35276	2.48624e-05
P46100	ATRX_HUMAN	ATRX	Transcriptional regulator ATRX	-1.35339	0.00262447
O75503	CLN5_HUMAN	CLN5	Ceroid-lipofuscinosis neuronal protein 5	-1.37177	0.000568689
P07686	HEXB_HUMAN	HEXB	Beta-hexosaminidase subunit beta	-1.3751	0.000130741
Q8N5S9	KKCC1_HUMAN	CAMKK1	Calcium/calmodulin-dependent protein kinase kinase 1	-1.37564	0.000617469
P51617	IRAK1_HUMAN	IRAK1	Interleukin-1 receptor-associated kinase 1	-1.37785	0.0168
Q8TE82	S3TC1_HUMAN	SH3TC1	SH3 domain and tetratricopeptide repeat-containing protein 1	-1.39392	0.000158164
P02655	APOC2_HUMAN	APOC2	Apolipoprotein C-II	-1.42396	0.000226256
Q8WTV0	SCRB1_HUMAN	SCARB1	Scavenger receptor class B member 1	-1.43042	0.00068845
P98082	DAB2_HUMAN	DAB2	Disabled homolog 2	-1.43824	6.84057e-05
Q92673	SORL_HUMAN	SORL1	Sortilin-related receptor	-1.4447	0.00762685
P78380	OLR1_HUMAN	OLR1	Oxidized low-density lipoprotein receptor 1	-1.44542	0.00497848
Q8TDQ0	HAVR2_HUMAN	HAVCR2	Hepatitis A virus cellular receptor 2	-1.4558	0.000346301
Q9HC98	NEK6_HUMAN	NEK6	Serine/threonine-protein kinase Nek6	-1.46676	0.000252012
Q9BTE6	AASD1_HUMAN	AARSD1	Alanyl-tRNA editing protein Aarsd1	-1.482	0.00404753
P06865	HEXA_HUMAN	HEXA	Beta-hexosaminidase subunit alpha	-1.49441	7.72983e-06
O15440	MRP5_HUMAN	ABCC5	ATP-binding cassette sub-family C member 5	-1.50057	0.00741057
Q86WJ1	CHD1L_HUMAN	CHD1L	Chromodomain-helicase-DNA-binding protein 1-like	-1.50231	1.35112e-07
Q96BS2	CHP3_HUMAN	TESC	Calcineurin B homologous protein 3	-1.50525	6.48986e-05
Q08ET2;O15389	SIG14_HUMAN;SIGL5_HUMAN	SIGLEC5	Sialic acid-binding Ig-like lectin 5	-1.52425	0.00593593
Q08431	MFGM_HUMAN	MFGE8	Lactadherin	-1.59317	0.0376394
Q9H9A7	RMI1_HUMAN	RMI1	RecQ-mediated genome instability protein 1	-1.59942	0.0382091
Q9BRK5	CAB45_HUMAN	SDF4	45 kDa calcium-binding protein	-1.60528	0.000179442
O75911	DHRS3_HUMAN	DHRS3	Short-chain dehydrogenase/reductase 3	-1.61462	0.000541316
O00754	MA2B1_HUMAN	MAN2B1	Lysosomal alpha-mannosidase	-1.63139	2.26142e-05
Q8TC76	F110B_HUMAN	FAM110B	Protein FAM110B	-1.63997	0.00408794
Q9UIA0	CYH4_HUMAN	CYTH4	Cytohesin-4	-1.65047	6.92075e-07
Q92743	HTRA1_HUMAN	HTRA1	Serine protease HTRA1	-1.67327	0.00989067
P36897	TGFR1_HUMAN	TGFBR1	TGF-beta receptor type-1	-1.67723	1.69258e-05
Q96KN1	LRAT2_HUMAN	LRATD2	Protein LRATD2	-1.68261	0.000884744
P32246	CCR1_HUMAN	CCR1	C-C chemokine receptor type 1	-1.68893	0.000136232
P15260	INGR1_HUMAN	IFNGR1	Interferon gamma receptor 1	-1.69482	0.000616613
Q13203	MYBPH_HUMAN	MYBPH	Myosin-binding protein H	-1.71011	0.0129748
P35475	IDUA_HUMAN	IDUA	Alpha-L-iduronidase	-1.72332	0.00093315
Q13009	TIAM1_HUMAN	TIAM1	Rho guanine nucleotide exchange factor TIAM1	-1.73988	1.47193e-06
Q12866	MERTK_HUMAN	MERTK	Tyrosine-protein kinase Mer	-1.79628	4.17862e-05
P01019	ANGT_HUMAN	AGT	Angiotensinogen	-1.82541	0.0124816
Q9H244	P2Y12_HUMAN	P2RY12	P2Y purinoceptor 12	-1.8284	0.00193062
P55899	FCGRN_HUMAN	FCGRT	IgG receptor FcRn large subunit p51	-1.85245	6.25974e-06
Q8NCC3	PAG15_HUMAN	PLA2G15	Phospholipase A2 group XV	-1.86411	1.46121e-05
P30530	UFO_HUMAN	AXL	Tyrosine-protein kinase receptor UFO	-1.87057	0.000355426
Q9BTU6	P4K2A_HUMAN	PI4K2A	Phosphatidylinositol 4-kinase type 2-alpha	-1.87476	0.00386861
P38571	LICH_HUMAN	LIPA	Lysosomal acid lipase/cholesteryl ester hydrolase	-1.8893	0.000134715
O14544	SOCS6_HUMAN	SOCS6	Suppressor of cytokine signaling 6	-1.89214	0.000799579
Q9NRN5	OLFL3_HUMAN	OLFML3	Olfactomedin-like protein 3	-1.90266	0.000286293
Q86YT9	JAML_HUMAN	JAML	Junctional adhesion molecule-like	-1.92232	0.0307947
Q9NQ92	COPRS_HUMAN	COPRS	Coordinator of PRMT5 and differentiation stimulator	-1.95121	0.00206673
P01023	A2MG_HUMAN	A2M	Alpha-2-macroglobulin	-1.96781	0.000372943
P01034	CYTC_HUMAN	CST3	Cystatin-C	-2.00795	0.000487164
Q9Y5Y6	ST14_HUMAN	ST14	Suppressor of tumorigenicity 14 protein	-2.00899	0.00218286
Q5T7P8	SYT6_HUMAN	SYT6	Synaptotagmin-6	-2.01757	0.00582739
Q07954	LRP1_HUMAN	LRP1	Prolow-density lipoprotein receptor-related protein 1	-2.02026	0.000130425
O94956	SO2B1_HUMAN	SLCO2B1	Solute carrier organic anion transporter family member 2B1	-2.02904	1.22949e-05
Q8TED4	G6PT3_HUMAN	SLC37A2	Glucose-6-phosphate exchanger SLC37A2	-2.02924	0.000189047
P25025	CXCR2_HUMAN	CXCR2	C-X-C chemokine receptor type 2	-2.06661	0.00720049
P20132	SDHL_HUMAN	SDS	L-serine dehydratase/L-threonine deaminase	-2.11009	0.000405365
Q6UX71	PXDC2_HUMAN	PLXDC2	Plexin domain-containing protein 2	-2.14775	3.25702e-07
Q99541	PLIN2_HUMAN	PLIN2	Perilipin-2	-2.23645	0.00768457
P15884	ITF2_HUMAN	TCF4	Transcription factor 4	-2.37018	0.00063341
P07333	CSF1R_HUMAN	CSF1R	Macrophage colony-stimulating factor 1 receptor	-2.39984	4.28923e-05
Q9BY15	AGRE3_HUMAN	ADGRE3	Adhesion G protein-coupled receptor E3	-2.41267	0.000195921
P23921	RIR1_HUMAN	RRM1	Ribonucleoside-diphosphate reductase large subunit	-2.4314	7.1025e-06
O00584	RNT2_HUMAN	RNASET2	Ribonuclease T2	-2.43733	3.3312e-07
Q02078;Q14814;Q06413	MEF2A_HUMAN;MEF2C_HUMAN;MEF2D_HUMAN	MEF2A	Myocyte-specific enhancer factor 2A	-2.4512	1.75448e-06
P10451	OSTP_HUMAN	SPP1	Osteopontin	-2.45172	0.00235859
Q8WV28	BLNK_HUMAN	BLNK	B-cell linker protein	-2.56097	3.09313e-06
Q9Y6R7	FCGBP_HUMAN	FCGBP	IgGFc-binding protein	-2.61569	0.0243532
Q86VB7	C163A_HUMAN	CD163	Scavenger receptor cysteine-rich type 1 protein M130	-2.7611	0.000984103
Q96BZ4	PLD4_HUMAN	PLD4	5'-3' exonuclease PLD4	-2.78187	1.57894e-05
Q9UBG0	MRC2_HUMAN	MRC2	C-type mannose receptor 2	-2.8641	4.70427e-07
Q8N9I0	SYT2_HUMAN	SYT2	Synaptotagmin-2	-2.88653	0.00135317
P49238	CX3C1_HUMAN	CX3CR1	CX3C chemokine receptor 1	-2.96002	2.53003e-05
Q9NZC2	TREM2_HUMAN	TREM2	Triggering receptor expressed on myeloid cells 2	-2.98867	0.000223275
O00483	NDUA4_HUMAN	NDUFA4	Cytochrome c oxidase subunit NDUFA4	-3.10413	3.61047e-07
Q9NY15	STAB1_HUMAN	STAB1	Stabilin-1	-3.90968	2.40557e-05
Q9H6X2	ANTR1_HUMAN	ANTXR1	Anthrax toxin receptor 1	-4.09366	6.26241e-06
P01833	PIGR_HUMAN	PIGR	Polymeric immunoglobulin receptor	-4.13208	8.59319e-06

## Sheet: Table S3
Column1	Column2	Column4	Column5
Ingenuity Canonical Pathways	-log(p-value)	z-score	Molecules
© 2000-2025 QIAGEN. All rights reserved.
Interferon alpha/beta signaling	20.8	4.899	EIF2AK2,HLA-A,HLA-B,HLA-C,HLA-E,HLA-F,IFI35,IFIT1,IFIT2,IFIT3,IFIT5,IFITM1,IRF4,IRF9,ISG15,ISG20,MX1,MX2,OAS1,OAS2,OAS3,PTPN1,STAT1,STAT2
Interferon gamma signaling	12.7	4.025	B2M,CD44,GBP1,HLA-A,HLA-B,HLA-C,HLA-E,HLA-F,ICAM1,IFNGR1,IRF4,IRF9,JAK2,OAS1,OAS2,OAS3,PML,PTAFR,PTPN1,STAT1
Role of Hypercytokinemia/hyperchemokinemia in the Pathogenesis of Influenza	12.5	3.742	CCL3,EIF2AK2,IFIT2,IFIT3,IL1B,IL1RN,IRF9,ISG15,ISG20,MX1,NFKB1,NFKB2,OAS1,OAS2,OAS3,RIGI,STAT1,STAT2
Interferon Signaling	11.8	2.121	IFI35,IFIT1,IFIT3,IFITM1,IFNGR1,IRF9,ISG15,JAK2,MX1,OAS1,STAT1,STAT2,TAP1
Systemic Lupus Erythematosus in B Cell Signaling Pathway	8.87	3.024	BLNK,CD40,HCK,IFIH1,IFIT2,IFIT3,IFNGR1,IL1B,IRAK1,IRF9,ISG15,ISG20,JAK2,LILRB3,MCL1,MRAS,NFAT5,NFKB1,NFKB2,PIK3AP1,PIK3C2B,RASGRP3,REL,RELB,RRAS,SRC,STAT1,STAT2,TLR8,TRAF1,TRAF3,YES1
JAK/STAT Signaling	8.82	2.309	CEBPB,JAK2,JAK3,MRAS,NFKB1,NFKB2,PIK3C2B,PTPN1,REL,RELB,RRAS,SOCS6,STAT1,STAT2,STAT5A
Role of RIG1-like Receptors in Antiviral Innate Immunity	8.75	2.121	CASP10,DHX58,IFIH1,NFKB1,NFKB2,NFKBIA,REL,RELB,RIGI,TANK,TRAF3
ISGylation Signaling Pathway	8.68	3.5	DTX3L,EIF2AK2,HERC5,IFIH1,IRF4,IRF9,ISG15,NFAT5,NFKB1,NFKB2,RIGI,SQSTM1,STAT1,STAT2,TLR8,UBE2L6
TREM1 Signaling	8.4	2.714	CASP5,CCL3,CD40,CD86,ICAM1,IL1B,IRAK1,JAK2,NFKB1,NFKB2,REL,RELB,STAT5A,TLR8
Multiple Sclerosis Signaling Pathway	8.38	2.4	C3,FAS,HLA-A,HLA-B,HLA-C,HLA-E,HLA-F,IFNGR1,IL1B,IRF4,MBP,NFKB1,NFKB2,P2RX7,PARP1,PARP10,PARP12,PARP14,PARP9,PLP1,RNF213,STAT1,TLR8
IL-27 Signaling Pathway	8.31	3	B2M,CD40,HLA-A,HLA-B,HLA-C,HLA-E,HLA-F,IFNGR1,JAK2,JAK3,MCL1,NFKB1,NFKB2,PIK3C2B,REL,RELB,STAT1,TLR8
Cyclophilin Signaling Pathway	7.95	2.449	AGT,B2M,CD44,CD47,HLA-A,HLA-B,HLA-C,HLA-E,HLA-F,IL1B,JAK2,JAK3,LRP1,NCF1,NFAT5,NFKB1,NFKB2,NFKBIA,OLR1,PIK3C2B,SPP1,STAT5A,TCF4,WNT5A
DDX58/IFIH1-mediated induction of interferon-alpha/beta	7.43	3.606	CASP10,DHX58,HERC5,IFIH1,ISG15,NFKB1,NFKB2,NFKBIA,RIGI,TANK,TNFAIP3,TRAF3,UBE2L6
Antigen Presentation Pathway	7.34	2.828	B2M,HLA-A,HLA-B,HLA-C,HLA-E,HLA-F,PSMB9,TAP1,TAP2,TAPBP
NLR signaling pathways	6.96	2.111	CASP4,HMOX1,IRAK1,MEFV,NFKB1,NFKB2,P2RX7,PANX1,RIPK2,TNFAIP3,TXN
Role of PKR in Interferon Induction and Antiviral Response	6.78	2.496	CASP5,EIF2AK2,FAS,IFIH1,IFNGR1,IL1B,IRF9,NFKB1,NFKB2,NFKBIA,REL,RELB,RIGI,STAT1,STAT2,TRAF3
Acute Phase Response Signaling	6.68	2.324	A2M,AGT,C3,CEBPB,HMOX1,IL1B,IL1RN,IRAK1,JAK2,MRAS,NFKB1,NFKB2,NFKBIA,REL,RELB,RRAS,SOCS6,SOD2,TCF4
IL-12 Signaling and Production in Macrophages	6.65	3.578	APOC2,C3,CD40,CD47,CEBPB,DHX58,IFIH1,IFNGR1,JAK2,NFAT5,NFKB1,NFKB2,PIK3C2B,PRKAG2,REL,RELB,RIGI,RIPK2,RXRA,STAT1,TICAM2
Dendritic Cell Maturation	6.43	2.683	B2M,CD40,CD86,HLA-A,HLA-B,HLA-C,HLA-E,HLA-F,ICAM1,IL1B,IL1RN,JAK2,LTBR,NFKB1,NFKB2,NFKBIA,PIK3C2B,REL,RELB,STAT1,STAT2,TREM2
OAS antiviral response	5.97	2.236	FLNA,OAS1,OAS2,OAS3,RIGI
Folate Signaling Pathway	5.9	2.333	ALDH1L2,CDKN1B,DHFR,JAK2,JAK3,MTHFD2,NFKB1,NFKB2,OAS2,SRC
TEC Kinase Signaling	5.64	2.138	FAS,GTF2I,HCK,ITGA4,ITGA6,ITGB5,ITGB7,JAK2,JAK3,MRAS,NFKB1,NFKB2,PIK3C2B,REL,RELB,SRC,STAT1,STAT2,STAT5A,YES1
IL-6 Signaling	5.47	2.714	A2M,CEBPB,IL1B,IL1RN,JAK2,MCL1,MRAS,NFKB1,NFKB2,NFKBIA,PIK3C2B,REL,RELB,RRAS
Pyroptosis Signaling Pathway	5.24	2.53	CASP4,CASP5,GBP1,IL1B,MEFV,NFKB1,NFKB2,P2RX7,PANX1,PRKAG2,TLR8,TRAF3
PI3K/AKT Signaling	5.04	2.333	CDKN1B,CXCR2,IL3RA,ITGA4,ITGA6,ITGB5,ITGB7,JAK2,JAK3,MCL1,MRAS,NFKB1,NFKB2,NFKBIA,REL,RELB,RRAS
B Cell Activating Factor Signaling	5.03	2.236	NFAT5,NFKB1,NFKB2,NFKBIA,REL,RELB,TRAF1,TRAF3
CTLA4 Signaling in Cytotoxic T Lymphocytes	4.96	-3.153	B2M,CD86,HCK,HLA-A,HLA-B,HLA-C,HLA-E,HLA-F,HMOX1,IDO1,MRAS,NFAT5,NFKB1,NFKB2,PIK3C2B,PLD4,RRAS,SRC,YES1
T Cell Receptor Signaling	4.69	2	B2M,CD86,CDKN1B,HLA-A,HLA-B,HLA-C,HLA-E,HLA-F,ICAM1,MRAS,NFAT5,NFKB1,NFKB2,NFKBIA,PIK3C2B,REL,RELB,RRAS,TCF4
Inflammasome pathway	4.68	2.449	CASP5,IL1B,NFKB1,NFKB2,P2RX7,PANX1
Cachexia Signaling Pathway	4.55	2.683	AGT,CASP10,CASP4,CASP5,CASP7,CEBPB,EIF2AK2,ERN1,IFNGR1,IL1B,IL1RN,NFKB1,NFKB2,PHGDH,PIK3C2B,PRKAG2,PSMB9,PSME2,STAT1,STAT2,STAT5A,TGFBR1,TLR8
Pathogen Induced Cytokine Storm Signaling Pathway	4.4	2.236	C3,CASP7,CCL3,CCR1,CD163,CXCR2,DHX58,IFIH1,IFNGR1,IL1B,IL1RN,IRF9,JAK2,MLKL,NFKB1,NFKB2,P2RX7,RIGI,SLC2A5,STAT1,STAT5A,STX11,TLR8
Role of JAK1 and JAK3 in γc Cytokine Signaling	4.4	2.121	BLNK,IRS2,JAK2,JAK3,MRAS,PIK3C2B,RRAS,STAT1,STAT5A
Glycation Signaling Pathway	4.34	2.183	ERN1,ICAM1,IL1B,IRAK1,JAK2,MRAS,NCF1,NFKB1,NFKB2,OLR1,PIK3C2B,RRAS,SCARB1,SRC,STAB1,STAT1,TXN
PPAR Signaling	4.33	-2.828	IL1B,IL1RN,MRAS,NFKB1,NFKB2,NFKBIA,REL,RELB,RRAS,RXRA,STAT5A
Oncostatin M Signaling	4.08	2.449	CHI3L1,JAK2,JAK3,MRAS,RRAS,STAT1,STAT5A
ISG15 antiviral mechanism	4.05	3	EIF2AK2,HERC5,IFIT1,ISG15,MX1,MX2,RIGI,STAT1,UBE2L6
Preeclampsia Signaling Pathway	4.01	3.051	HMOX1,ICAM1,IL1B,IL1RN,JAK2,JAK3,JUNB,NFKB1,NFKB2,NFKBIA,PIK3C2B,PRKAG2,RXRA
Colorectal Cancer Metastasis Signaling	3.85	2.138	IFNGR1,JAK2,JAK3,LRP1,MRAS,NFKB1,NFKB2,PIK3C2B,PRKAG2,REL,RELB,RRAS,SRC,STAT1,TCF4,TGFBR1,TLR8,WNT5A
IL-17A Signaling in Fibroblasts	3.83	2.333	CEBPB,IL1B,JAK2,NFKB1,NFKB2,NFKBIA,REL,RELB,ZC3H12A
Growth hormone receptor signaling	3.76	2.236	IRS2,JAK2,PTPN1,STAT1,STAT5A
Role of Macrophages, Fibroblasts and Endothelial Cells in Rheumatoid Arthritis	3.75	2.683	CEBPB,ICAM1,IL1B,IL1RN,IRAK1,JAK2,LRP1,LTBR,MRAS,NFAT5,NFKB1,NFKBIA,PIK3C2B,RRAS,SRC,TCF4,TLR8,TRAF1,TRAF3,WNT5A
Interleukin-20 family signaling	3.48	2.236	JAK2,JAK3,STAT1,STAT2,STAT5A
Myelination Signaling Pathway	3.32	2.065	HCK,ITGA6,ITGB5,ITGB7,MBP,MRAS,MTHFD2,NFKB1,NFKB2,PIK3C2B,PLP1,PRKAG2,RAPGEF2,RRAS,SMAD1,SRC,TCF4,WNT5A,YES1
TRIM21 Intracellular Antibody Signaling Pathway	3.27	2.84	IFI35,IFNGR1,IL1B,IRF4,JAK2,MAP1LC3A,NFKB1,NFKB2,NMI,PSMB9,PSME2,RIGI,SQSTM1,STAT1,STAT2
DHCR24 Signaling Pathway	3.14	-2.111	AGT,APOC2,C3,HMOX1,MRAS,NFKB1,NFKB2,PIK3C2B,RRAS,RXRA,SCARB1
Signaling by NTRK3 (TRKC)	3.1	2.236	CASP10,CASP4,CASP5,CASP7,SRC
DNA damage-induced 14-3-3σ Signaling	3.03	2.236	CASP10,CASP4,CASP5,CASP7,CDK1,CDKN1B
LXR/RXR Activation	3	-2.828	AGT,APOC2,C3,IL1B,IL1RN,NFKB1,NFKB2,REL,RELB,RXRA
Autophagy	2.99	2.138	CDKN1B,ERN1,IRS2,MAP1LC3A,NFKB1,NFKB2,OPTN,PI4K2A,PIK3C2B,PRKAG2,RIPK2,SLC1A5,SQSTM1,TRAF3
Adrenomedullin signaling pathway	2.93	2.111	C3,CEBPB,IL1B,IL1RN,MRAS,NFKB1,NFKB2,PIK3C2B,PRKAG2,REL,RELB,RRAS,RXRA
Th17 Activation Pathway	2.89	2.121	IL1B,IRAK1,IRF4,JAK2,JAK3,NFAT5,NFKB1,NFKB2,REL,RELB
Class I MHC mediated antigen processing and presentation	2.85	3.578	B2M,CTSS,DTX3L,FBXO6,HERC5,HLA-A,HLA-B,HLA-C,HLA-E,HLA-F,ITGB5,MRC2,NCF1,PSMB9,PSME2,RNF213,TAP1,TAP2,TAPBP,UBE2L6
PDGF Signaling	2.84	2.121	EIF2AK2,JAK2,JAK3,MRAS,PIK3C2B,RRAS,SRC,STAT1
Autism Signaling Pathway	2.78	2.138	ALDH1L2,B2M,CAMKK1,HLA-A,HLA-B,HLA-C,HLA-E,HLA-F,IL1B,IL1RN,MRAS,PIK3C2B,PRKAG2,RRAS,RXRA,TCF4,WNT5A
Role of Chondrocytes in Rheumatoid Arthritis Signaling Pathway	2.6	2.53	CEBPB,IL1B,IL1RN,IRAK1,JAK2,LRP1,MLKL,NFKB1,NFKB2,PRKAG2
Interleukin-1 family signaling	2.35	2.333	IL1B,IL1RN,IRAK1,NFKB1,NFKBIA,PSMB9,PSME2,RIPK2,SQSTM1
Role of Osteoblasts in Rheumatoid Arthritis Signaling Pathway	2.3	2.309	CTSS,IL1B,JAK2,JAK3,LRP1,PIK3C2B,SMAD1,SRC,STAT1,STAT2,STAT5A,TCF4,WNT5A
WNT/Ca+ pathway	2.26	2	NFAT5,NFKB1,NFKB2,REL,RELB,WNT5A
Signaling by CSF3 (G-CSF)	2.21	2	HCK,JAK2,STAT1,STAT5A
Nicotinate metabolism	2.16	2	NAMPT,PARP10,PARP14,PARP9
Ceramide Signaling	2.15	2.236	MRAS,NFKB1,NFKB2,PIK3C2B,REL,RELB,RRAS
Regulation of IL-2 Expression in Activated and Anergic T Lymphocytes	2.06	3	MRAS,NFAT5,NFKB1,NFKB2,NFKBIA,REL,RELB,RRAS,TGFBR1
PKCθ Signaling in T Lymphocytes	2.05	2.53	CD86,HLA-A,HLA-B,MRAS,NFAT5,NFKB1,NFKB2,NFKBIA,PIK3C2B,REL,RELB,RRAS
Endocannabinoid Cancer Inhibition Pathway	1.96	2.121	CASP10,CASP4,CASP5,CASP7,CDKN1B,PIK3C2B,PRKAG2,SRC,TCF4
MyD88-independent TLR4 cascade	1.84	2	OPTN,TANK,TICAM2,TRAF3
Resolution of Abasic Sites (AP sites)	1.84	-2	LIG1,MPG,PARP1,XRCC1
CGAS-STING Signaling Pathway	1.79	2.121	ICAM1,IDO1,IL1B,MAP1LC3A,NFKB1,NFKB2,NFKBIA,STAT1
Mitophagy	1.77	2	MAP1LC3A,OPTN,SQSTM1,SRC
Mitotic G1 phase and G1/S transition	1.76	2.828	CDK1,CDKN1B,DHFR,JAK2,POLA1,PSMB9,PSME2,SRC
Protein Ubiquitination Pathway	1.71	2.828	B2M,DNAJA1,DNAJC1,HLA-A,HLA-B,HLA-C,HLA-E,HLA-F,PSMB9,PSME2,TAP1,TAP2,UBE2L6
Hepatic Cholestasis	1.67	2.111	IL1B,IL1RN,IRAK1,NFKB1,NFKB2,NFKBIA,PRKAG2,REL,RELB,RXRA,TJP2
RHO GTPases Activate WASPs and WAVEs	1.66	2	ABI1,HCK,SRC,YES1
Opioid Signaling Pathway	1.64	2.111	CDKN1B,HCK,MRAS,NFKB1,NFKB2,NFKBIA,PRKAG2,RGS12,RPS6KA4,RRAS,SRC,TCF4,YES1
BER (Base Excision Repair) Pathway	1.63	-2	LIG1,MPG,PARP1,XRCC1
C-type lectin receptors (CLRs)	1.59	2.828	IL1B,NFKB1,NFKB2,NFKBIA,PSMB9,PSME2,RELB,SRC
Communication between Innate and Adaptive Immune Cells	1.58	3.162	B2M,CCL3,CD40,CD86,HLA-A,HLA-B,HLA-C,HLA-E,HLA-F,IL1B,IL1RN,TLR8
Xenobiotic Metabolism AHR Signaling Pathway	1.53	2	ALDH1L2,IL1B,NFKB1,NFKB2,REL,RELB
RHO GTPase cycle	1.48	2.357	ABI1,ARAP2,ARHGAP10,BASP1,CDC42SE2,CPD,EPSTI1,FERMT2,NCF1,SH3PXD2A,SLC1A5,SPTAN1,SPTBN1,SRC,TIAM1,TJP2,TRIP10,VRK2
Role of JAK family kinases in IL-6-type Cytokine Signaling	1.35	2	JAK2,JUNB,MCL1,STAT1,STAT5A
E3 ubiquitin ligases ubiquitinate target proteins	1.32	2	HLA-A,HLA-B,PEX13,SELENOS

## Sheet: Table S4
				E3/3_5_NT	E3/3_6_NT	E3/3_7_NT	E3/3_3_NT	E3/3_2_NT	E3/3_5_PLCG2_NT	E4/4_5_NT	E4/4_5_PLCG2_NT
UniProt AC all	UniProt Ids	Genes	First Protein Name	log2 LFQ iMG_07	log2 LFQ iMG_16	log2 LFQ iMG_19	log2 LFQ iMG_33	log2 LFQ iMG_36	log2 LFQ iMG_22	log2 LFQ iMG_10	log2 LFQ iMG_25	Log2 fold change	p value
P20591;P20592	MX1_HUMAN;MX2_HUMAN	MX1;MX2	Interferon-induced GTP-binding protein Mx1	14.3798	15.7361	13.6265	16.4026	15.1389	14.4716	17.3257	16.6587	2.03294	0.0379597
P48065	S6A12_HUMAN	SLC6A12	Sodium- and chloride-dependent betaine transporter	14.1621	14.0585	13.3611	13.2082	12.3757	13.8614	15.4209	15.0435	1.72768	0.0144513
P35548	MSX2_HUMAN	MSX2	Homeobox protein MSX-2	10.2673	10	10	10.1316	11.0336	10.3365	11.8231	12.1606	1.69702	0.00129327
P02144	MYG_HUMAN	MB	Myoglobin	15.2059	16.2659	14.5597	14.869	15.8857	14.8527	17.0061	16.9296	1.69469	0.0142429
P48960	AGRE5_HUMAN	ADGRE5	Adhesion G protein-coupled receptor E5	14.2884	13.4278	13.679	14.7985	14.1065	14.339	15.7187	15.8443	1.67496	0.00387398
O00151	PDLI1_HUMAN	PDLIM1	PDZ and LIM domain protein 1	14.9515	14.6535	14.2196	15.7351	16.2068	15.3083	16.999	16.6941	1.66739	0.0223047
Q9UK22	FBX2_HUMAN	FBXO2	F-box only protein 2	14.1759	13.8013	12.6284	13.9135	14.9019	13.9187	15.7014	15.3626	1.64204	0.0251835
Q9NPY3	C1QR1_HUMAN	CD93	Complement component C1q receptor	12.4222	11.9606	11.3631	12.4393	13.7964	12.5435	14.3384	13.6941	1.59538	0.0418638
Q9Y6K5	OAS3_HUMAN	OAS3	2'-5'-oligoadenylate synthase 3	15.2047	15.4764	14.9991	16.0174	15.605	15.2073	16.9318	16.6694	1.38226	0.00253942
Q5JUR7	TEX30_HUMAN	TEX30	Testis-expressed protein 30	12.4809	11.278	11.6648	11.392	12.6843	12.0239	13.3031	13.1921	1.32691	0.0217
P54753	EPHB3_HUMAN	EPHB3	Ephrin type-B receptor 3	13.8175	12.9892	12.8674	12.8178	13.8586	13.8451	14.6897	14.5977	1.27775	0.0169651
Q7Z4H3	HDDC2_HUMAN	HDDC2	5'-deoxynucleotidase HDDC2	15.0184	15.0152	14.7207	14.5256	15.4952	15.1433	16.2796	16.2103	1.25854	0.00245751
O00291	HIP1_HUMAN	HIP1	Huntingtin-interacting protein 1	13.6402	11.9699	12.5606	12.1012	13.1608	13.2442	13.9983	14.0637	1.25152	0.0469587
Q9UHN6	CEIP2_HUMAN	CEMIP2	Cell surface hyaluronidase	12.9067	12.5807	11.5745	12.1294	12.8446	12.9125	13.9089	13.5745	1.25032	0.0224454
P50453	SPB9_HUMAN	SERPINB9	Serpin B9	19.0973	18.6615	18.2688	18.976	19.432	18.7264	20.1186	20.0837	1.24079	0.0060065
P09326	CD48_HUMAN	CD48	CD48 antigen	15.2269	14.6693	14.5926	14.3148	14.8336	15.1276	16.1793	15.8786	1.23484	0.00345717
P35222	CTNB1_HUMAN	CTNNB1	Catenin beta-1	13.644	13.7277	13.3775	12.9037	14.7862	13.6322	14.6584	15.1542	1.22776	0.0420774
Q8WWN8	ARAP3_HUMAN	ARAP3	Arf-GAP with Rho-GAP domain, ANK repeat and PH domain-containing protein 3	13.2862	14.0621	14.6534	13.5987	12.9596	13.9819	15.0082	14.87	1.1821	0.0398633
Q9Y2D5	AKAP2_HUMAN	AKAP2	A-kinase anchor protein 2	11.8279	11.938	11.3874	12.6236	11.5641	12.4377	13.2344	13.0555	1.18182	0.0173745
O75815	BCAR3_HUMAN	BCAR3	Breast cancer anti-estrogen resistance protein 3	11.4531	11.4517	11.0276	11.6221	12.0976	11.5753	13.1322	12.2209	1.13864	0.014574
P28065	PSB9_HUMAN	PSMB9	Proteasome subunit beta type-9	16.0796	15.7466	15.5304	16.2235	16.4996	15.7923	17.1486	17.0532	1.1222	0.00554333
Q01064	PDE1B_HUMAN	PDE1B	Calcium/calmodulin-dependent 3',5'-cyclic nucleotide phosphodiesterase 1B	13.9185	13.8965	13.6447	13.6686	13.3686	14.0599	15.0803	14.6773	1.11935	0.00169697
P49184	DNSL1_HUMAN	DNASE1L1	Deoxyribonuclease-1-like 1	12.081	11.521	11.8178	11.1391	11.3857	11.7116	12.9831	12.4602	1.11226	0.00702715
P07204	TRBM_HUMAN	THBD	Thrombomodulin	10.7021	10.2148	10	10.7428	10.7838	11.2014	12.0741	11.3427	1.1009	0.0236178
Q8IWU2	LMTK2_HUMAN	LMTK2	Serine/threonine-protein kinase LMTK2	11.2468	10	10.8889	10.4835	11.1784	10	11.5747	11.8924	1.1006	0.0407151
Q93033	IGSF2_HUMAN	CD101	Immunoglobulin superfamily member 2	16.8146	15.901	16.7843	17.0555	16.6187	16.5742	17.6864	17.7079	1.07242	0.0106101
P17050	NAGAB_HUMAN	NAGA	Alpha-N-acetylgalactosaminidase	17.1124	16.2885	17.574	16.8455	17.4791	16.7906	17.8538	18.1812	1.00248	0.033385
Q9Y4E1;Q641Q2	WAC2A_HUMAN;WAC2C_HUMAN	WASHC2A	WASH complex subunit 2A	15.7409	15.9668	15.8489	15.7624	15.5388	15.8902	14.9467	14.6459	-0.995035	0.000279632
Q16822;P35558	PCKGC_HUMAN;PCKGM_HUMAN	PCK1	Phosphoenolpyruvate carboxykinase, cytosolic [GTP]	16.9321	16.7035	16.938	16.7648	16.0681	16.6995	15.5832	15.7822	-1.00164	0.00622913
Q08426	ECHP_HUMAN	EHHADH	Peroxisomal bifunctional enzyme	14.2579	13.8564	13.1981	13.7639	13.6143	14.173	13.0367	12.5802	-1.00214	0.0173752
Q7L311	ARMX2_HUMAN	ARMCX2	Armadillo repeat-containing X-linked protein 2	14.3539	14.0952	13.495	13.4474	13.0817	14.1749	12.5519	12.9913	-1.0031	0.0417683
O43156	TTI1_HUMAN	TTI1	TELO2-interacting protein 1 homolog	13.4159	13.4715	13.1492	13.051	13.2743	13.3362	12.3063	12.2529	-1.00344	0.000157799
Q9H173	SIL1_HUMAN	SIL1	Nucleotide exchange factor SIL1	12.7068	13.2816	13.1959	13.4068	12.5878	12.627	12.0103	11.8914	-1.0168	0.0100645
Q92521	PIGB_HUMAN	PIGB	GPI mannosyltransferase 3	12.8437	12.9978	12.7944	13.0134	11.9042	12.901	11.4737	11.9039	-1.05364	0.018449
Q641Q2	WAC2A_HUMAN	WASHC2A	WASH complex subunit 2A	14.7289	14.9833	14.9984	14.8076	14.496	14.9009	13.883	13.6352	-1.06008	0.000439212
Q8N490	PNKD_HUMAN	PNKD	Probable hydrolase PNKD	13.775	14.4875	14.1123	14.0205	13.6371	14.411	12.8762	13.1474	-1.06212	0.00640558
Q3T906	GNPTA_HUMAN	GNPTAB	N-acetylglucosamine-1-phosphotransferase subunits alpha/beta	13.9622	14.2871	13.5392	13.9584	12.8471	13.8301	12.7205	12.5459	-1.10418	0.0254778
Q9Y228	T3JAM_HUMAN	TRAF3IP3	TRAF3-interacting JNK-activating modulator	13.9867	14.3326	14.3988	14.2294	13.5967	14.3459	12.8524	13.2021	-1.12109	0.00368066
Q9Y3C0	WASC3_HUMAN	WASHC3	WASH complex subunit 3	16.3805	16.7349	16.837	16.6966	16.4066	16.7077	15.4848	15.5247	-1.12243	0.000203686
Q12768	WASC5_HUMAN	WASHC5	WASH complex subunit 5	16.239	16.3139	16.4243	16.2887	15.9631	16.1715	15.1326	15.0864	-1.12392	7.41003e-05
P41226	UBA7_HUMAN	UBA7	Ubiquitin-like modifier-activating enzyme 7	16.2294	16.4584	16.4078	16.2788	15.7348	15.8884	15.094	14.9805	-1.12901	0.00208612
Q86WU2	LDHD_HUMAN	LDHD	Probable D-lactate dehydrogenase, mitochondrial	12.6268	12.9203	12.3877	12.7557	12.8969	12.7711	12.1854	10.9967	-1.13536	0.0115197
Q7L266	ASGL1_HUMAN	ASRGL1	Isoaspartyl peptidase/L-asparaginase	14.7548	14.818	15.5374	15.3454	14.9502	14.0474	13.8265	13.7131	-1.13902	0.0265698
Q2M389	WASC4_HUMAN	WASHC4	WASH complex subunit 4	15.9741	16.2248	16.1877	16.007	15.8104	16.097	14.9548	14.8499	-1.14781	6.31314e-05
Q8NBU5	ATAD1_HUMAN	ATAD1	Outer mitochondrial transmembrane helix translocase	15.2468	15.399	14.9516	15.305	14.276	15.3005	14.0571	13.7905	-1.15604	0.0113465
Q9H8P0	PORED_HUMAN	SRD5A3	Polyprenol reductase	12.656	12.3927	13.1833	13.3178	11.7234	12.9039	11.6663	11.4024	-1.16182	0.0384891
Q5TGZ0	MIC10_HUMAN	MICOS10	MICOS complex subunit MIC10	16.6772	17.8187	16.727	17.1008	16.8911	17.1933	15.3301	16.4787	-1.16359	0.0306444
O60704	TPST2_HUMAN	TPST2	Protein-tyrosine sulfotransferase 2	14.9751	14.6839	14.291	14.908	14.0392	15.1287	13.4198	13.5923	-1.16492	0.0107074
Q96BI1	S22AI_HUMAN	SLC22A18	Solute carrier family 22 member 18	16.1086	16.5789	15.9504	16.4408	15.6199	16.5988	15.259	14.8363	-1.16857	0.00907025
Q07954	LRP1_HUMAN	LRP1	Prolow-density lipoprotein receptor-related protein 1	17.471	17.8757	17.6034	17.9387	16.3558	17.552	16.2888	16.2452	-1.19914	0.0311783
O75352	MPU1_HUMAN	MPDU1	Mannose-P-dolichol utilization defect 1 protein	18.9294	18.85	18.5307	18.9902	18.896	19.1775	17.7514	17.639	-1.20045	0.000292317
Q92673	SORL_HUMAN	SORL1	Sortilin-related receptor	16.8645	16.823	17.5876	17.3874	15.6816	16.6496	15.5681	15.633	-1.23173	0.048506
C4AMC7;A8K0Z3;Q6VEQ5;A8MWX3;Q9NQA3	WASH6_HUMAN	WASH6P	WAS protein family homolog 6	15.4027	15.8744	15.6997	15.5585	15.2954	15.4141	14.4767	14.1048	-1.25005	0.000483055
Q8NBI5	S43A3_HUMAN	SLC43A3	Solute carrier family 43 member 3	16.2658	16.7918	16.0401	16.8275	15.4041	16.2062	14.5073	15.4919	-1.25635	0.0331302
O95858	TSN15_HUMAN	TSPAN15	Tetraspanin-15	15.7563	16.2619	15.8704	15.6371	14.4788	16.1394	14.6688	14.1531	-1.27969	0.0402867
P22732	GTR5_HUMAN	SLC2A5	Solute carrier family 2, facilitated glucose transporter member 5	14.3753	14.9886	14.9343	15.5026	13.8972	13.7064	13.2528	13.3118	-1.28507	0.0477823
Q8NI22	MCFD2_HUMAN	MCFD2	Multiple coagulation factor deficiency protein 2	15.2963	15.4084	15.3349	15.5542	14.8188	15.0657	14.4014	13.4913	-1.30003	0.00423306
Q96K49	TM87B_HUMAN	TMEM87B	Transmembrane protein 87B	13.4984	13.7179	13.6342	13.8674	12.8727	13.7751	12.0745	12.3848	-1.33132	0.00303397
Q9H3U5	MFSD1_HUMAN	MFSD1	Major facilitator superfamily domain-containing protein 1	16.3436	16.755	16.1286	16.5296	15.6562	16.4766	15.0228	14.9205	-1.34327	0.00338608
P53355	DAPK1_HUMAN	DAPK1	Death-associated protein kinase 1	13.2793	14.2596	14.3535	13.7808	13.7917	13.6701	12.2353	12.6965	-1.38993	0.00451669
P36941	TNR3_HUMAN	LTBR	Tumor necrosis factor receptor superfamily member 3	11.3278	10.8212	10.502	11.0684	10.8832	10.9304	10.4414	8.53483	-1.43402	0.0271262
P50135	HNMT_HUMAN	HNMT	Histamine N-methyltransferase	15.7879	16.4118	17.235	16.5987	15.8222	15.8028	14.7714	14.9021	-1.43966	0.0165281
P21397	AOFA_HUMAN	MAOA	Amine oxidase [flavin-containing] A	16.3814	17.2102	16.6589	16.4207	15.1142	16.2519	15.0058	14.7682	-1.45257	0.0307772
P08133	ANXA6_HUMAN	ANXA6	Annexin A6	19.2418	20.4212	19.2083	19.2656	20.1269	19.6993	18.1627	18.2385	-1.45993	0.0090844
P35475	IDUA_HUMAN	IDUA	Alpha-L-iduronidase	15.6034	15.3248	16.2617	14.5956	16.0371	15.4925	14.1061	14.0171	-1.49089	0.0142327
P21730	C5AR1_HUMAN	C5AR1	C5a anaphylatoxin chemotactic receptor 1	16.5734	16.7827	17.0321	16.8571	15.4751	16.4501	15.121	14.9378	-1.49899	0.0113718
P51606	RENBP_HUMAN	RENBP	N-acylglucosamine 2-epimerase	16.9377	17.5567	17.6199	17.2835	17.6322	16.8284	15.6104	16.0086	-1.5002	0.00176657
P48728	GCST_HUMAN	AMT	Aminomethyltransferase, mitochondrial	15.1522	14.9033	14.3159	15.024	14.4678	13.4407	13.2622	12.7679	-1.53562	0.0195843
P02786	TFR1_HUMAN	TFRC	Transferrin receptor protein 1	16.8096	17.3274	16.2874	16.9693	16.0373	17.079	15.095	15.3097	-1.54935	0.00583214
Q8WWB7	GLMP_HUMAN	GLMP	Glycosylated lysosomal membrane protein	16.1732	16.1848	16.1435	16.5131	15.5686	16.0422	14.6152	14.3902	-1.60154	0.000486726
Q9NY15	STAB1_HUMAN	STAB1	Stabilin-1	17.6722	17.5118	17.3074	17.4797	17.3776	18.1967	16.0695	15.7272	-1.69257	0.000542369
Q9Y5S1	TRPV2_HUMAN	TRPV2	Transient receptor potential cation channel subfamily V member 2	15.836	16.0724	15.7186	15.8977	14.5613	15.6695	13.9272	13.5458	-1.88945	0.00378452
O15440	MRP5_HUMAN	ABCC5	ATP-binding cassette sub-family C member 5	13.5385	14.1967	13.6451	13.6692	12.6841	13.5549	11.5713	11.6818	-1.9215	0.00188747
P05413	FABPH_HUMAN	FABP3	Fatty acid-binding protein, heart	15.5161	16.6231	16.3829	15.7508	14.7792	15.7326	13.5703	14.1189	-1.95285	0.0083112
Q8IX05	CD302_HUMAN	CD302	CD302 antigen	13.022	12.613	12.9791	13.5687	12.9454	12.9005	9.68389	12.4175	-1.9541	0.0290787
O75888	TNF13_HUMAN	TNFSF13	Tumor necrosis factor ligand superfamily member 13	13.539	13.6635	12.804	13.0218	14.0353	14.0487	10.8521	12.2051	-1.99011	0.0072236
Q9Y6U3	ADSV_HUMAN	SCIN	Adseverin	15.5501	14.0467	14.9525	15.4207	14.0417	15.484	12.9701	12.8764	-1.99273	0.00921229
Q9Y279	VSIG4_HUMAN	VSIG4	V-set and immunoglobulin domain-containing protein 4	16.6235	17.8016	17.8412	17.3272	15.1138	16.8784	14.8533	14.9658	-2.02137	0.0369103
P02545	LMNA_HUMAN	LMNA	Prelamin-A/C	15.3558	13.8836	15.2354	15.9342	15.1087	14.7778	12.0778	13.0389	-2.49088	0.00429141
Q14956	GPNMB_HUMAN	GPNMB	Transmembrane glycoprotein NMB	16.1099	16.4091	16.7229	17.1409	15.8714	16.4591	13.9901	13.8869	-2.51371	0.000289329
Q02318	CP27A_HUMAN	CYP27A1	Sterol 26-hydroxylase, mitochondrial	15.9229	16.0535	16.2679	16.5211	13.5278	15.4749	13.1375	11.7917	-3.16342	0.0108961

## Sheet: Table S5
					E3/3_5_LI	E3/3_6_LI	E3/3_7_LI	E3/3_3_LI	E3/3_2_LI	E3/3_5_PLCG2_LI	E4/4_5_LI	E4/4_5_PLCG2_LI
UniProt AC protein group	UniProt AC all	UniProt Ids	Genes	First Protein Name	log2 LFQ iMG_08	log2 LFQ iMG_17	log2 LFQ iMG_20	log2 LFQ iMG_34	log2 LFQ iMG_37	log2 LFQ iMG_23	log2 LFQ iMG_11	log2 LFQ iMG_26	Log2 fold change	p value
P12830	P12830	CADH1_HUMAN	CDH1	Cadherin-1	11.4634	10.7933	10	10.5111	12.6045	11.9944	13.1211	13.8421	2.25383	0.0233578
P02144	P02144	MYG_HUMAN	MB	Myoglobin	13.6417	15.6579	14.4087	13.945	15.3162	13.7671	16.3218	16.0251	1.71735	0.0353728
P35222	P35222	CTNB1_HUMAN	CTNNB1	Catenin beta-1	13.8077	13.1837	13.1267	13.172	14.5452	14.0693	15.2029	15.5204	1.71086	0.00840661
Q7Z4H3	Q7Z4H3	HDDC2_HUMAN	HDDC2	5'-deoxynucleotidase HDDC2	15.0745	14.7723	14.6573	13.9119	15.1829	14.6678	16.2884	16.2566	1.5614	0.00340124
Q01064	Q01064	PDE1B_HUMAN	PDE1B	Calcium/calmodulin-dependent 3',5'-cyclic nucleotide phosphodiesterase 1B	13.4559	13.7636	12.94	12.9016	12.8296	13.6439	14.9918	14.6297	1.55494	0.00281998
Q9BTE6	Q9BTE6	AASD1_HUMAN	AARSD1	Alanyl-tRNA editing protein Aarsd1	14.0406	13.9152	13.829	12.2898	14.1757	13.7644	15.3581	14.9638	1.49183	0.0292747
Q96DR4	Q96DR4	STAR4_HUMAN	STARD4	StAR-related lipid transfer protein 4	12.427	11.9853	11.7827	11.8928	12.553	11.8024	13.6728	13.2204	1.37268	0.00225313
Q9NXF7	Q9NXF7	DCA16_HUMAN	DCAF16	DDB1- and CUL4-associated factor 16	10	10	10.0606	10	10.6772	10.648	11.7089	11.3279	1.28747	0.0028566
Q93033	Q93033	IGSF2_HUMAN	CD101	Immunoglobulin superfamily member 2	16.1338	15.1901	15.6958	16.0183	15.7715	15.7993	16.9111	17.1754	1.27512	0.00231163
P26232;P35221	P35221;P26232	CTNA1_HUMAN;CTNA2_HUMAN	CTNNA1;CTNNA2	Catenin alpha-2	14.382	14.413	14.3641	14.3287	15.009	14.3435	15.5697	15.9092	1.26606	0.00100008
Q9UJT0	Q9UJT0	TBE_HUMAN	TUBE1	Tubulin epsilon chain	10	11.0058	11.0972	10	10.7658	11.2544	11.8451	12.0249	1.24783	0.024039
Q9UDY2	Q9UDY2	ZO2_HUMAN	TJP2	Tight junction protein ZO-2	13.6668	12.2372	12.705	12.4696	13.3009	13.1717	14.2135	14.1033	1.23316	0.0229929
Q9UK22	Q9UK22	FBX2_HUMAN	FBXO2	F-box only protein 2	14.0788	13.8338	13.2236	14.1273	14.7296	13.8551	15.184	15.2123	1.22344	0.015481
Q0IIM8	Q0IIM8	TBC8B_HUMAN	TBC1D8B	TBC1 domain family member 8B	13.1125	12.8914	11.6568	12.0908	12.3948	13.2561	13.6213	13.8647	1.17594	0.0465653
P18510	P18510	IL1RA_HUMAN	IL1RN	Interleukin-1 receptor antagonist protein	15.2159	16.1755	16.0759	16.2191	16.6776	15.5337	17.3074	17.0046	1.17307	0.0255026
P35221	P35221	CTNA1_HUMAN	CTNNA1	Catenin alpha-1	14.4518	14.4841	13.9603	14.2029	14.9015	14.7379	15.6304	15.6153	1.16646	0.00384738
Q96BZ4	Q96BZ4	PLD4_HUMAN	PLD4	5'-3' exonuclease PLD4	17.1506	15.8207	16.6505	17.2525	16.8173	16.9486	18.1619	17.6939	1.15455	0.027707
Q9Y2M5	Q9Y2M5	KLH20_HUMAN	KLHL20	Kelch-like protein 20	10	10	10.2474	10.3899	10.7656	10.7793	11.4439	11.5505	1.1335	0.00496623
Q9UH03	Q9UH03	SEPT3_HUMAN	SEPTIN3	Neuronal-specific septin-3	12.0099	12.2466	11.8918	11.9477	12.6255	11.4994	13.2659	13.0203	1.10624	0.00836243
Q6BCY4	Q6BCY4	NB5R2_HUMAN	CYB5R2	NADH-cytochrome b5 reductase 2	11.8689	11.2602	11.3136	11.2795	12.0577	11.8622	12.8312	12.5262	1.07164	0.00845019
Q07108	Q07108	CD69_HUMAN	CD69	Early activation antigen CD69	12.7934	12.1947	12.4322	12.8451	11.4732	12.898	13.5548	13.4477	1.06181	0.0405928
P48065	P48065	S6A12_HUMAN	SLC6A12	Sodium- and chloride-dependent betaine transporter	15.3452	15.0514	14.9028	15.0845	14.0598	15.6771	15.8817	16.2556	1.04855	0.0447942
Q8N1Q1	Q8N1Q1	CAH13_HUMAN	CA13	Carbonic anhydrase 13	11.5248	10.4623	11.229	10.6713	11.8995	10.9413	12.371	11.9556	1.04193	0.0451293
Q8IWT0	Q8IWT0	ARCH_HUMAN	ZBTB8OS	Protein archease	13.3841	14.0108	14.3777	13.118	13.4809	13.6423	14.8656	14.5097	1.01865	0.0269989
Q86UX6	Q86UX6	ST32C_HUMAN	STK32C	Serine/threonine-protein kinase 32C	12.5239	12.388	12.7408	12.4208	12.6052	12.5952	13.6301	13.4816	1.01019	6.5749e-05
Q9P2M7	Q9P2M7	CING_HUMAN	CGN	Cingulin	15.9196	15.3313	14.6774	15.5209	15.9581	15.7731	16.4623	16.5909	0.996533	0.0326325
O15327	O15327	INP4B_HUMAN	INPP4B	Inositol polyphosphate 4-phosphatase type II	12.6609	12.6682	12.0545	11.5889	12.9993	12.2679	13.3292	13.408	0.995353	0.0392572
P21397	P21397	AOFA_HUMAN	MAOA	Amine oxidase [flavin-containing] A	16.9869	17.1528	16.9296	17.0449	15.787	16.9997	15.7325	15.9066	-0.997262	0.0402158
P08133	P08133	ANXA6_HUMAN	ANXA6	Annexin A6	19.8045	20.1366	18.7764	19.4666	19.9089	19.916	18.6649	18.6535	-1.00902	0.032381
Q5VYY1	Q5VYY1	ANR22_HUMAN	ANKRD22	Ankyrin repeat domain-containing protein 22	19.1513	19.2822	20.0559	19.9072	19.3061	19.5471	18.0477	18.9869	-1.02438	0.026938
P51606	P51606	RENBP_HUMAN	RENBP	N-acylglucosamine 2-epimerase	16.8231	16.8779	16.9539	16.6779	17.7404	16.5594	15.556	16.2611	-1.03022	0.0266401
Q9NQA3	C4AMC7;A8K0Z3;Q6VEQ5;A8MWX3;Q9NQA3	WASH6_HUMAN	WASH6P	WAS protein family homolog 6	15.3005	15.8278	15.5805	15.2444	15.0605	15.1254	14.5409	14.1113	-1.03041	0.00519876
A3KMH1	A3KMH1	VWA8_HUMAN	VWA8	von Willebrand factor A domain-containing protein 8	15.4009	16.3712	15.6722	16.3153	15.4644	15.5492	14.6693	14.8387	-1.04151	0.018749
Q8NI22	Q8NI22	MCFD2_HUMAN	MCFD2	Multiple coagulation factor deficiency protein 2	15.1049	15.5477	15.6657	15.8171	15.0227	15.7391	14.5662	14.3054	-1.04709	0.00677801
Q12959	Q12959	DLG1_HUMAN	DLG1	Disks large homolog 1	13.4911	12.8152	13.2046	13.1976	12.8143	13.4748	11.8429	12.3897	-1.04996	0.00659768
Q96FZ2	Q96FZ2	HMCES_HUMAN	HMCES	Abasic site processing protein HMCES	12.4325	12.7815	12.6306	12.5819	12.6258	12.1819	11.0554	11.9163	-1.05319	0.00616452
Q9BX68	Q9BX68	HINT2_HUMAN	HINT2	Adenosine 5'-monophosphoramidase HINT2	17.0987	16.9178	16.4959	17.6233	16.4313	17.2411	16.0044	15.8251	-1.05329	0.0215794
Q8WWB7	Q8WWB7	GLMP_HUMAN	GLMP	Glycosylated lysosomal membrane protein	15.8506	15.7212	14.8356	15.8119	15.156	15.9391	14.6733	14.3135	-1.059	0.0219066
P17181	P17181	INAR1_HUMAN	IFNAR1	Interferon alpha/beta receptor 1	10.918	12.2434	11.6612	12.0729	12.2614	11.9502	10.4943	11.086	-1.06101	0.0389813
Q9NVV5	Q9NVV5	AIG1_HUMAN	AIG1	Androgen-induced gene 1 protein	13.8003	13.3616	13.5463	14.2615	13.4128	13.6463	12.4725	12.742	-1.06423	0.00574234
P36222	P36222	CH3L1_HUMAN	CHI3L1	Chitinase-3-like protein 1	19.2327	19.7962	20.2431	19.1527	19.4548	19.3992	18.4196	18.5214	-1.07597	0.0123788
Q9UBR5	Q9UBR5	CKLF_HUMAN	CKLF	Chemokine-like factor	15.0898	14.1846	14.89	14.9146	14.5173	14.7667	13.7317	13.5462	-1.08821	0.0045666
Q14644	Q14644	RASA3_HUMAN	RASA3	Ras GTPase-activating protein 3	13.8583	13.8991	13.6869	14.0694	12.9982	14.1812	12.3313	13.0516	-1.09074	0.0222571
P49257	P49257	LMAN1_HUMAN	LMAN1	Protein ERGIC-53	17.6947	17.594	18.0749	18.4109	17.6018	17.7387	16.6346	16.8802	-1.09508	0.00459883
P02778	P02778	CXL10_HUMAN	CXCL10	C-X-C motif chemokine 10	18.0474	19.1962	18.6825	19.2862	18.1632	19.0618	17.9638	17.3235	-1.09592	0.0420762
O75352	O75352	MPU1_HUMAN	MPDU1	Mannose-P-dolichol utilization defect 1 protein	19.5482	19.29	19.0584	19.8219	19.0859	19.5629	18.2217	18.3505	-1.10842	0.00273312
Q8NBR6	Q8NBR6	MINY2_HUMAN	MINDY2	Ubiquitin carboxyl-terminal hydrolase MINDY-2	13.669	13.4868	13.4192	13.5597	12.534	13.7392	12.4438	12.1377	-1.11058	0.0163495
Q9Y228	Q9Y228	T3JAM_HUMAN	TRAF3IP3	TRAF3-interacting JNK-activating modulator	13.9914	13.8898	13.5343	14.579	13.2221	14.5253	12.583	13.1015	-1.11468	0.0370282
Q96AC1	Q96AC1;Q9BQL6	FERM2_HUMAN	FERMT2	Fermitin family homolog 2	14.41	13.7452	15.0293	14.1088	13.7572	14.3538	13.1895	13.0315	-1.12355	0.0207632
P12318	P31994;P12318;P31995	FCG2A_HUMAN	FCGR2A	Low affinity immunoglobulin gamma Fc region receptor II-a	14.2642	14.6971	13.8013	15.5444	14.0602	14.3555	13.3066	13.3381	-1.13144	0.0478949
Q8IY17	Q8IY17	PLPL6_HUMAN	PNPLA6	Patatin-like phospholipase domain-containing protein 6	15.5446	15.6537	15.7339	15.9747	15.5185	15.6335	14.6466	14.4431	-1.13165	0.00014043
Q5VTU8	Q5VTU8;P56381	AT5EL_HUMAN	ATP5F1EP2	ATP synthase subunit epsilon-like protein, mitochondrial	16.2127	15.8168	16.0581	16.2166	15.9501	16.192	14.9356	14.9411	-1.13603	8.9185e-05
P53370	P53370	NUDT6_HUMAN	NUDT6	Nucleoside diphosphate-linked moiety X motif 6	16.8074	16.5261	16.2276	17.2141	16.0524	16.7656	15.1753	15.7443	-1.13908	0.0158144
Q6N069	Q6N069	NAA16_HUMAN	NAA16	N-alpha-acetyltransferase 16, NatA auxiliary subunit	13.3684	13.6918	13.0604	13.1116	13.6324	13.2615	11.9749	12.4228	-1.15548	0.00202815
Q9NXF8	Q9NXF8	ZDHC7_HUMAN	ZDHHC7	Palmitoyltransferase ZDHHC7	13.2613	13.0981	12.5736	13.0216	12.5132	12.7374	11.3372	12.0649	-1.1665	0.00629911
O94919	O94919	ENDD1_HUMAN	ENDOD1	Endonuclease domain-containing 1 protein	13.3017	12.2026	13.3133	13.2327	12.709	13.02	11.5451	12.0443	-1.1685	0.0150008
Q9BPX1	Q9BPX1	DHB14_HUMAN	HSD17B14	17-beta-hydroxysteroid dehydrogenase 14	13.1311	12.7258	12.3947	13.7535	12.7279	12.2585	11.3789	11.8933	-1.19583	0.0301733
Q6YBV0	Q6YBV0	S36A4_HUMAN	SLC36A4	Proton-coupled amino acid transporter 4	10.126	10.8846	10.3047	10.7452	10	11.195	9.7946	8.88701	-1.20178	0.0264809
P01730	P01730	CD4_HUMAN	CD4	T-cell surface glycoprotein CD4	14.2655	13.9555	14.2561	13.9215	14.2998	14.446	12.8033	13.1651	-1.20652	0.000480662
Q8NBU5	Q8NBU5	ATAD1_HUMAN	ATAD1	Outer mitochondrial transmembrane helix translocase	15.251	15.3507	15.0911	15.4128	13.9565	15.3089	13.8697	13.8298	-1.21206	0.0258611
Q9H7M9	Q9H7M9	VISTA_HUMAN	VSIR	V-type immunoglobulin domain-containing suppressor of T-cell activation	15.7398	15.5788	15.7446	15.7452	15.3648	15.9283	14.1641	14.7744	-1.21432	0.000969932
Q9HC98	Q9HC98	NEK6_HUMAN	NEK6	Serine/threonine-protein kinase Nek6	11.732	12.2403	12.1515	11.9546	11.7572	12.3193	10.6518	10.9482	-1.22586	0.00083335
P07858	P07858	CATB_HUMAN	CTSB	Cathepsin B	18.7709	18.6873	19.2454	19.6325	18.4647	19.0603	17.5462	17.9528	-1.22737	0.00986159
Q9BQC3	Q9BQC3	DPH2_HUMAN	DPH2	2-(3-amino-3-carboxypropyl)histidine synthase subunit 2	11.6294	12.9568	12.3117	12.3353	12.3581	11.2454	11.1583	10.6593	-1.23063	0.0389635
Q04941	Q04941	PLP2_HUMAN	PLP2	Proteolipid protein 2	14.5159	13.9107	14.4464	15.2962	14.3281	14.3272	13.5548	12.9152	-1.23578	0.015902
P53794	P53794	SC5A3_HUMAN	SLC5A3	Sodium/myo-inositol cotransporter	13.7152	14.1148	14.0461	14.4137	12.5559	13.9851	12.8602	12.2566	-1.24675	0.0489713
Q7L266	Q7L266	ASGL1_HUMAN	ASRGL1	Isoaspartyl peptidase/L-asparaginase	13.5901	13.5491	14.6325	13.9627	14.0421	13.5644	12.4599	12.7771	-1.2716	0.00771175
Q9BVG9	Q9BVG9	PTSS2_HUMAN	PTDSS2	Phosphatidylserine synthase 2	13.6128	13.5866	12.3618	13.4548	12.3319	13.8066	11.9223	11.8784	-1.29209	0.0402391
Q8TDQ0	Q8TDQ0	HAVR2_HUMAN	HAVCR2	Hepatitis A virus cellular receptor 2	14.9903	13.9465	13.7439	14.6704	14.0299	14.2803	12.6956	13.2641	-1.297	0.0138042
O94876	O94876	TMCC1_HUMAN	TMCC1	Transmembrane and coiled-coil domains protein 1	11.5772	12.3129	11.5992	12.0941	11.3793	11.6414	10.6262	10.3047	-1.30192	0.00328374
O75911	O75911	DHRS3_HUMAN	DHRS3	Short-chain dehydrogenase/reductase 3	13.069	13.4103	14.1453	13.928	12.9753	12.6138	11.4714	12.5748	-1.33383	0.039803
Q9P0V8	Q9P0V8	SLAF8_HUMAN	SLAMF8	SLAM family member 8	14.7736	14.7959	15.0613	15.3855	14.2828	15.1323	12.9976	14.1285	-1.3422	0.0136432
P58335	P58335	ANTR2_HUMAN	ANTXR2	Anthrax toxin receptor 2	14.1716	13.1726	13.0173	13.4285	12.8932	13.8251	12.1659	11.7588	-1.45574	0.00884738
Q5VZP5	Q5VZP5	STYL2_HUMAN	STYXL2	Serine/threonine/tyrosine-interacting-like protein 2	10.8358	11.726	11.1829	10.9595	11.8721	10.096	9.34274	9.94824	-1.46655	0.0267358
P05413	P05413	FABPH_HUMAN	FABP3	Fatty acid-binding protein, heart	15.9303	15.8299	15.8051	15.3036	14.5278	15.2534	13.7719	14.1205	-1.49547	0.0101133
P21730	P21730	C5AR1_HUMAN	C5AR1	C5a anaphylatoxin chemotactic receptor 1	16.2858	16.2514	16.204	16.5433	15.3877	16.2001	14.4902	14.6382	-1.58116	0.00171475
P25101	P25101	EDNRA_HUMAN	EDNRA	Endothelin-1 receptor	13.3561	14.4821	13.5494	13.5365	12.5285	13.6096	11.8858	11.8682	-1.63336	0.0126073
Q9H1U4	Q9H1U4	MEGF9_HUMAN	MEGF9	Multiple epidermal growth factor-like domains protein 9	13.6126	14.0192	13.7612	13.0967	13.5383	13.9129	11.5454	12.4535	-1.65738	0.00221812
Q9Y6U3	Q9Y6U3	ADSV_HUMAN	SCIN	Adseverin	16.2375	14.2775	15.0397	15.299	13.8955	15.7474	13.535	13.2176	-1.70647	0.0416744
P48728	P48728	GCST_HUMAN	AMT	Aminomethyltransferase, mitochondrial	15.3564	14.6922	14.1112	15.3258	13.867	13.3574	12.8246	12.5445	-1.76711	0.0272275
Q9Y5S1	Q9Y5S1	TRPV2_HUMAN	TRPV2	Transient receptor potential cation channel subfamily V member 2	16.5689	16.2249	15.6416	16.8763	15.1747	16.5106	14.3253	14.2504	-1.87835	0.00765962
O43291	O43291	SPIT2_HUMAN	SPINT2	Kunitz-type protease inhibitor 2	12.103	12.4241	12.0126	13.7638	12.2869	13.0406	10.1079	11.2114	-1.94553	0.013796
Q9Y279	Q9Y279	VSIG4_HUMAN	VSIG4	V-set and immunoglobulin domain-containing protein 4	14.5869	17.2655	16.7069	15.4812	16.1182	15.3866	13.3718	14.374	-2.05131	0.035951
Q6PI73	Q6PI73	LIRA6_HUMAN	LILRA6	Leukocyte immunoglobulin-like receptor subfamily A member 6	13.9611	NaN	15.8817	14.5046	13.3013	13.8774	12.2242	12.2679	-2.0592	0.037541
P02545	P02545	LMNA_HUMAN	LMNA	Prelamin-A/C	15.1066	14.1191	14.0815	16.6392	15.1435	16.0688	12.6884	13.1914	-2.25318	0.0268658
